# Supplementary material for: “In silico” mechanistic studies as predictive tools in microwave-assisted organic synthesis
Source: Royal Society of Chemistry journal article supplement (doi:10.1039/c0ob01037e), 2011-01-01
Supplement: c0ob01037e.pdf [file c0ob01037e.pdf]

# “*In silico*” Mechanistic studies as predictive tools in Microwave Assisted Organic Synthesis

Antonio Rodriguez<sup>a</sup>, Pilar Prieto,<sup>a,\*</sup> Antonio de la Hoz,<sup>a</sup> Ángel Díaz-Ortiz<sup>a</sup>,

<sup>a</sup>Facultad de Química, Universidad de Castilla-La Mancha, E-13071, Ciudad Real, Spain.

**Table S1.** Total electronic energies<sup>a</sup> (E, in a.u.), zero-point correction of energies ( $\Delta ZPE$ , in a.u.), and number of imaginary frequencies<sup>b</sup> (NIMAG) of all stationary points discussed in the main text for the IMDA reaction of **N-Alkyl-2-cyano-1-azadienes**.

| Structure    | E           | $\Delta ZPE$ | NIMAG( $\nu$ ) |
|--------------|-------------|--------------|----------------|
| <b>1a</b>    | -498.702039 | 0.220191     | 0              |
| <b>1b</b>    | -498.695929 | 0.220062     |                |
| <b>2a</b>    | -498.745729 | 0.226705     | 0              |
| <b>2a'</b>   | -498.746626 | 0.226548     |                |
| <b>2b</b>    | -498.746619 | 0.226555     | 0              |
| <b>2b'</b>   | -498.745729 | 0.226705     |                |
| <b>3a</b>    | -690.384484 | 0.272776     | 0              |
| <b>3b</b>    | -690.384818 | 0.272749     |                |
| <b>4a</b>    | -690.427348 | 0.279229     | 0              |
| <b>4a'</b>   | -690.427222 | 0.279371     | 0              |
| <b>4b</b>    | -690.427222 | 0.279371     | 0              |
| <b>4b'</b>   | -690.427350 | 0.279227     | 0              |
| <b>5</b>     | -690.397701 | 0.272971     | 0              |
| <b>TS2a</b>  | -498.665294 | 0.221348     | 1(-476.6978)   |
| <b>TS2a'</b> | -498.655901 | 0.221551     | 1(-458.6955)   |
| <b>TS2b</b>  | -498.655902 | 0.221549     | 1(-458.6451)   |
| <b>TS2b'</b> | -498.665294 | 0.221348     | 1(-476.4700)   |
| <b>TS4a</b>  | -690.344238 | 0.273975     | 1(-471.8690)   |
| <b>TS4a'</b> | -690.346324 | 0.274184     | 1(-476.2527)   |
| <b>TS4b</b>  | -690.346325 | 0.274183     | 1(-476.4144)   |
| <b>TS4b'</b> | -690.330774 | 0.274296     | 1(-489.3194)   |

<sup>a</sup>Computed at the level of theory B3LYP(L1A1)/6-31G\*. <sup>b</sup>The imaginary frequency  $\nu$  (in parentheses) is given in  $\text{cm}^{-1}$ .

**Table S2.** Total electronic energies<sup>a</sup> (E, in a.u.), zero-point correction of energies ( $\Delta$ ZPE, in a.u.), and number of imaginary frequencies<sup>b</sup> (NIMAG) of all stationary points discussed in the main text for the **Intra- and intermolecular Diels-Alder reactions of 2(1H)-Pyrazinones in Ionic Liquid doped solvents.**

| Structure                     | E            | $\Delta$ ZPE | NIMAG( $\nu$ ) |
|-------------------------------|--------------|--------------|----------------|
| <b>6a</b>                     | -1261.176529 | 0.246816     | 0              |
| <b>6b</b>                     | -1300.460247 | 0.275567     | 0              |
| <b>7a</b>                     | -1261.186855 | 0.252481     | 0              |
| <b>7a'</b>                    | -1261.188188 | 0.252338     | 0              |
| <b>7b</b>                     | -1300.473023 | 0.281700     | 0              |
| <b>7b'</b>                    | -1300.472648 | 0.281434     | 0              |
| <b>8</b>                      | -1122.271450 | 0.150618     | 0              |
| <b>9</b>                      | -1655.272857 | 0.270910     | 0              |
| <b>10</b>                     | -1102.289922 | 0.258190     | 0              |
| <b>11</b>                     | -1255.693962 | 0.162908     | 0              |
| <b>12</b>                     | -1200.835218 | 0.210209     | 0              |
| <b>TS7a</b>                   | -1261.130632 | 0.248251     | 1 (-488.9376)  |
| <b>TS7a'</b>                  | -1261.133016 | 0.248185     | 1 (-495.8373)  |
| <b>TS7b</b>                   | -1300.410241 | 0.276958     | 1 (-487.8939)  |
| <b>TS7b'</b>                  | -1300.414821 | 0.277350     | 1 (-524.3010)  |
| <b>TS9</b>                    | -1655.198442 | 0.266782     | 1 (-395.2034)  |
| <b>TS10</b>                   | -1655.223937 | 0.267352     | 1 (-496.8457)  |
| <b>TS11</b>                   | -1655.237659 | 0.267383     | 1 (-488.4153)  |
| <b>TS12</b>                   | -1200.774658 | 0.205000     | 1 (-480.8771)  |
| <b>bmimPF<sub>6</sub> (A)</b> | -1363.776535 | 0.246482     | 0              |
| <b>bmimPF<sub>6</sub> (B)</b> | -1363.777774 | 0.246426     | 0              |
| <b>bmimPF<sub>6</sub> (C)</b> | -1363.776743 | 0.246206     | 0              |

<sup>a</sup>Computed at the level of theory B3LYP(L1A1)/6-31G\*. <sup>b</sup>The imaginary frequency  $\nu$  (in parentheses) is given in  $\text{cm}^{-1}$ .

Cartesian coordinates (optimized at the B3LYP(PCM)/6-31G) of all the stationary points discussed in the main text for the reaction between.

**1a**

| Center Number | Atomic Number | Atomic Type | Coordinates (Angstroms) |           |           |
|---------------|---------------|-------------|-------------------------|-----------|-----------|
|               |               |             | X                       | Y         | Z         |
| 1             | 6             | 0           | 3.869864                | -1.701370 | 0.187834  |
| 2             | 6             | 0           | 2.590893                | -1.476161 | 0.509393  |
| 3             | 6             | 0           | 1.817998                | -0.288256 | 0.112879  |
| 4             | 7             | 0           | 0.595251                | -0.167929 | 0.477356  |
| 5             | 6             | 0           | -0.205082               | 0.994360  | 0.109606  |
| 6             | 6             | 0           | -1.495207               | 0.509528  | -0.590574 |
| 7             | 6             | 0           | -2.418039               | -0.382621 | 0.261731  |
| 8             | 6             | 0           | -3.565843               | -0.934489 | -0.539652 |
| 9             | 6             | 0           | -4.856980               | -0.706474 | -0.296140 |
| 10            | 6             | 0           | 2.519639                | 0.711571  | -0.694217 |
| 11            | 7             | 0           | 3.088043                | 1.499647  | -1.332177 |
| 12            | 6             | 0           | -0.478934               | 1.809273  | 1.384555  |
| 13            | 1             | 0           | 4.377932                | -2.602800 | 0.515472  |
| 14            | 1             | 0           | 4.448551                | -1.000285 | -0.407746 |
| 15            | 1             | 0           | 2.019932                | -2.182560 | 1.106071  |
| 16            | 1             | 0           | 0.329461                | 1.643388  | -0.601537 |
| 17            | 1             | 0           | -2.048618               | 1.396057  | -0.926651 |
| 18            | 1             | 0           | -1.203704               | -0.035194 | -1.498681 |
| 19            | 1             | 0           | -1.819108               | -1.207223 | 0.670867  |
| 20            | 1             | 0           | -2.809449               | 0.182223  | 1.116253  |
| 21            | 1             | 0           | -3.291263               | -1.562213 | -1.389952 |
| 22            | 1             | 0           | -5.641702               | -1.133224 | -0.915198 |
| 23            | 1             | 0           | -5.180199               | -0.086024 | 0.537827  |
| 24            | 1             | 0           | -1.156415               | 2.640641  | 1.159770  |
| 25            | 1             | 0           | 0.452971                | 2.224887  | 1.781717  |
| 26            | 1             | 0           | -0.931306               | 1.188125  | 2.163048  |

**1b**

| Center Number | Atomic Number | Atomic Type | Coordinates (Angstroms) |           |           |
|---------------|---------------|-------------|-------------------------|-----------|-----------|
|               |               |             | X                       | Y         | Z         |
| 1             | 6             | 0           | -3.535642               | -1.733026 | -0.249251 |
| 2             | 6             | 0           | -2.611843               | -1.052020 | -0.936939 |
| 3             | 6             | 0           | -1.607192               | -0.148079 | -0.347556 |
| 4             | 6             | 0           | -1.654955               | -0.017901 | 1.110257  |
| 5             | 7             | 0           | -1.720102               | 0.058047  | 2.268641  |
| 6             | 7             | 0           | -0.778087               | 0.446949  | -1.122809 |
| 7             | 6             | 0           | 0.264398                | 1.379747  | -0.669022 |
| 8             | 6             | 0           | -0.323186               | 2.637890  | -0.005027 |
| 9             | 6             | 0           | 1.350823                | 0.706619  | 0.198923  |
| 10            | 6             | 0           | 2.067722                | -0.464775 | -0.499977 |
| 11            | 6             | 0           | 3.118747                | -1.094088 | 0.373731  |
| 12            | 6             | 0           | 4.421400                | -1.147312 | 0.093602  |
| 13            | 1             | 0           | -4.243741               | -2.380608 | -0.756560 |
| 14            | 1             | 0           | -3.617197               | -1.668725 | 0.832522  |
| 15            | 1             | 0           | -2.538392               | -1.122040 | -2.018969 |
| 16            | 1             | 0           | 0.754524                | 1.704434  | -1.595587 |
| 17            | 1             | 0           | 2.090678                | 1.476448  | 0.453243  |
| 18            | 1             | 0           | 0.918751                | 0.370201  | 1.149062  |

|    |   |   |           |           |           |
|----|---|---|-----------|-----------|-----------|
| 19 | 1 | 0 | 1.322819  | -1.222314 | -0.782021 |
| 20 | 1 | 0 | 2.523943  | -0.112589 | -1.434543 |
| 21 | 1 | 0 | 2.760732  | -1.524972 | 1.310793  |
| 22 | 1 | 0 | 5.134527  | -1.612641 | 0.768885  |
| 23 | 1 | 0 | 4.825443  | -0.730478 | -0.827200 |
| 24 | 1 | 0 | -1.093889 | 3.083182  | -0.642884 |
| 25 | 1 | 0 | 0.470437  | 3.379417  | 0.137051  |
| 26 | 1 | 0 | -0.762943 | 2.423380  | 0.972950  |

**2a**

| Center<br>Number | Atomic<br>Number | Atomic<br>Type | Coordinates (Angstroms) |           |           |
|------------------|------------------|----------------|-------------------------|-----------|-----------|
|                  |                  |                | X                       | Y         | Z         |
| 1                | 6                | 0              | 2.171980                | -0.903885 | -0.237935 |
| 2                | 6                | 0              | 0.775324                | -1.237831 | 0.299301  |
| 3                | 7                | 0              | -0.159295               | -0.099071 | 0.183307  |
| 4                | 6                | 0              | 0.353115                | 1.181763  | 0.035279  |
| 5                | 6                | 0              | 1.668937                | 1.494220  | 0.159799  |
| 6                | 6                | 0              | 2.697344                | 0.415710  | 0.350595  |
| 7                | 6                | 0              | 0.045168                | -2.360212 | -0.452518 |
| 8                | 6                | 0              | -1.434876               | -2.049599 | -0.203623 |
| 9                | 6                | 0              | -1.524182               | -0.507788 | -0.211728 |
| 10               | 6                | 0              | -2.617796               | 0.010882  | 0.729040  |
| 11               | 6                | 0              | -0.567647               | 2.244779  | -0.268180 |
| 12               | 7                | 0              | -1.289062               | 3.119333  | -0.530799 |
| 13               | 1                | 0              | 1.970873                | 2.531031  | 0.070447  |
| 14               | 1                | 0              | 3.635700                | 0.698903  | -0.142291 |
| 15               | 1                | 0              | 2.943570                | 0.284977  | 1.416065  |
| 16               | 1                | 0              | 2.122167                | -0.811193 | -1.330244 |
| 17               | 1                | 0              | 2.849358                | -1.734934 | -0.010760 |
| 18               | 1                | 0              | 0.870094                | -1.510050 | 1.363359  |
| 19               | 1                | 0              | 0.341468                | -3.356062 | -0.107697 |
| 20               | 1                | 0              | 0.277277                | -2.291933 | -1.523079 |
| 21               | 1                | 0              | -2.102925               | -2.496057 | -0.946163 |
| 22               | 1                | 0              | -1.738426               | -2.426962 | 0.781074  |
| 23               | 1                | 0              | -1.734971               | -0.152458 | -1.232424 |
| 24               | 1                | 0              | -2.699895               | 1.099953  | 0.705293  |
| 25               | 1                | 0              | -3.588066               | -0.403808 | 0.429535  |
| 26               | 1                | 0              | -2.411933               | -0.301477 | 1.759153  |

**2a'**

| Center<br>Number | Atomic<br>Number | Atomic<br>Type | Coordinates (Angstroms) |           |           |
|------------------|------------------|----------------|-------------------------|-----------|-----------|
|                  |                  |                | X                       | Y         | Z         |
| 1                | 6                | 0              | -0.534222               | 2.119182  | 0.490835  |
| 2                | 6                | 0              | -0.977039               | 1.000475  | -0.462835 |
| 3                | 7                | 0              | -0.077433               | -0.158871 | -0.372512 |
| 4                | 6                | 0              | 1.273093                | 0.070786  | -0.166413 |
| 5                | 6                | 0              | 1.800517                | 1.302285  | 0.051419  |
| 6                | 6                | 0              | 0.926932                | 2.516654  | 0.215757  |
| 7                | 6                | 0              | -2.362708               | 0.393755  | -0.187156 |
| 8                | 6                | 0              | -2.204867               | -1.082312 | -0.595810 |
| 9                | 6                | 0              | -0.771718               | -1.436823 | -0.149336 |
| 10               | 6                | 0              | -0.699524               | -1.942062 | 1.300842  |
| 11               | 6                | 0              | 2.146983                | -1.069859 | -0.258604 |

|    |   |   |           |           |           |
|----|---|---|-----------|-----------|-----------|
| 12 | 7 | 0 | 2.847588  | -1.996969 | -0.317533 |
| 13 | 1 | 0 | 2.878281  | 1.407042  | 0.106366  |
| 14 | 1 | 0 | 1.304882  | 3.137362  | 1.039586  |
| 15 | 1 | 0 | 0.984136  | 3.152380  | -0.681463 |
| 16 | 1 | 0 | -0.629026 | 1.757655  | 1.522655  |
| 17 | 1 | 0 | -1.197609 | 2.985534  | 0.385177  |
| 18 | 1 | 0 | -0.937006 | 1.392899  | -1.492878 |
| 19 | 1 | 0 | -3.156609 | 0.908369  | -0.736718 |
| 20 | 1 | 0 | -2.596957 | 0.471735  | 0.881746  |
| 21 | 1 | 0 | -2.953195 | -1.735970 | -0.137713 |
| 22 | 1 | 0 | -2.291212 | -1.183337 | -1.683870 |
| 23 | 1 | 0 | -0.335665 | -2.201808 | -0.804241 |
| 24 | 1 | 0 | -1.209743 | -2.908743 | 1.387422  |
| 25 | 1 | 0 | 0.338547  | -2.085362 | 1.616862  |
| 26 | 1 | 0 | -1.174586 | -1.239365 | 1.995194  |

**2b**

| Center<br>Number | Atomic<br>Number | Atomic<br>Type | Coordinates (Angstroms) |           |           |
|------------------|------------------|----------------|-------------------------|-----------|-----------|
|                  |                  |                | X                       | Y         | Z         |
| 1                | 6                | 0              | -0.544045               | 2.114188  | 0.491007  |
| 2                | 6                | 0              | -0.981260               | 0.995551  | -0.465388 |
| 3                | 7                | 0              | -0.076287               | -0.160302 | -0.378105 |
| 4                | 6                | 0              | 1.272813                | 0.075553  | -0.168395 |
| 5                | 6                | 0              | 1.794363                | 1.309044  | 0.052019  |
| 6                | 6                | 0              | 0.915158                | 2.519167  | 0.217303  |
| 7                | 6                | 0              | -2.364782               | 0.382820  | -0.190921 |
| 8                | 6                | 0              | -2.199872               | -1.093831 | -0.594584 |
| 9                | 6                | 0              | -0.765266               | -1.439853 | -0.146561 |
| 10               | 6                | 0              | -0.690607               | -1.936088 | 1.306642  |
| 11               | 6                | 0              | 2.152026                | -1.061098 | -0.260046 |
| 12               | 7                | 0              | 2.856951                | -1.984998 | -0.317855 |
| 13               | 1                | 0              | 2.871581                | 1.418572  | 0.108528  |
| 14               | 1                | 0              | 1.289789                | 3.140570  | 1.042111  |
| 15               | 1                | 0              | 0.969813                | 3.156250  | -0.679116 |
| 16               | 1                | 0              | -0.637418               | 1.749969  | 1.522029  |
| 17               | 1                | 0              | -1.211599               | 2.977540  | 0.387073  |
| 18               | 1                | 0              | -0.942477               | 1.390382  | -1.494439 |
| 19               | 1                | 0              | -3.159729               | 0.892096  | -0.743908 |
| 20               | 1                | 0              | -2.602121               | 0.463200  | 0.877093  |
| 21               | 1                | 0              | -2.945225               | -1.749422 | -0.134446 |
| 22               | 1                | 0              | -2.285317               | -1.199048 | -1.682307 |
| 23               | 1                | 0              | -0.326085               | -2.206872 | -0.796941 |
| 24               | 1                | 0              | -1.197137               | -2.904142 | 1.399337  |
| 25               | 1                | 0              | 0.348093                | -2.073585 | 1.623168  |
| 26               | 1                | 0              | -1.167985               | -1.231121 | 1.997088  |

**2b'**

| Center<br>Number | Atomic<br>Number | Atomic<br>Type | Coordinates (Angstroms) |           |           |
|------------------|------------------|----------------|-------------------------|-----------|-----------|
|                  |                  |                | X                       | Y         | Z         |
| 1                | 6                | 0              | -2.172317               | -0.903210 | -0.237916 |
| 2                | 6                | 0              | -0.775850               | -1.237667 | 0.299475  |
| 3                | 7                | 0              | 0.159280                | -0.099056 | 0.183868  |
| 4                | 6                | 0              | -0.352760               | 1.181891  | 0.035330  |

|    |   |   |           |           |           |
|----|---|---|-----------|-----------|-----------|
| 5  | 6 | 0 | -1.668439 | 1.494721  | 0.159429  |
| 6  | 6 | 0 | -2.697138 | 0.416602  | 0.350403  |
| 7  | 6 | 0 | -0.045950 | -2.360268 | -0.452365 |
| 8  | 6 | 0 | 1.434222  | -2.050001 | -0.203756 |
| 9  | 6 | 0 | 1.523945  | -0.508214 | -0.211763 |
| 10 | 6 | 0 | 2.617986  | 0.010005  | 0.728628  |
| 11 | 6 | 0 | 0.568372  | 2.244595  | -0.267992 |
| 12 | 7 | 0 | 1.290021  | 3.118983  | -0.530557 |
| 13 | 1 | 0 | -1.970012 | 2.531630  | 0.069892  |
| 14 | 1 | 0 | -2.943310 | 0.286081  | 1.415924  |
| 15 | 1 | 0 | -3.635486 | 0.700043  | -0.142399 |
| 16 | 1 | 0 | -2.850045 | -1.733968 | -0.010639 |
| 17 | 1 | 0 | -2.122442 | -0.810691 | -1.330269 |
| 18 | 1 | 0 | -0.870874 | -1.509936 | 1.363499  |
| 19 | 1 | 0 | -0.342391 | -3.356037 | -0.107403 |
| 20 | 1 | 0 | -0.278220 | -2.292108 | -1.522928 |
| 21 | 1 | 0 | 2.101979  | -2.496595 | -0.946495 |
| 22 | 1 | 0 | 1.737962  | -2.427529 | 0.780843  |
| 23 | 1 | 0 | 1.734451  | -0.152829 | -1.232521 |
| 24 | 1 | 0 | 2.700269  | 1.099083  | 0.705120  |
| 25 | 1 | 0 | 3.588066  | -0.404766 | 0.428613  |
| 26 | 1 | 0 | 2.412524  | -0.302581 | 1.758753  |

3a

| Center Number | Atomic Number | Atomic Type | Coordinates (Angstroms) |           |           |
|---------------|---------------|-------------|-------------------------|-----------|-----------|
|               |               |             | X                       | Y         | Z         |
| 1             | 6             | 0           | 2.428767                | -3.304435 | 0.111676  |
| 2             | 6             | 0           | 1.914139                | -2.833867 | -1.099215 |
| 3             | 6             | 0           | 1.098272                | -1.703661 | -1.123966 |
| 4             | 6             | 0           | 0.784824                | -1.026604 | 0.062909  |
| 5             | 6             | 0           | 1.295756                | -1.510539 | 1.272119  |
| 6             | 6             | 0           | 2.117103                | -2.640051 | 1.297770  |
| 7             | 6             | 0           | -0.088551               | 0.223150  | 0.045285  |
| 8             | 7             | 0           | -1.288421               | -0.059152 | -0.737369 |
| 9             | 6             | 0           | 0.613713                | 1.439655  | -0.609060 |
| 10            | 6             | 0           | 1.863465                | 1.910668  | 0.157187  |
| 11            | 6             | 0           | 2.537834                | 3.072022  | -0.521619 |
| 12            | 6             | 0           | 2.695396                | 4.286269  | 0.006366  |
| 13            | 6             | 0           | -2.461741               | 0.062409  | -0.235167 |
| 14            | 6             | 0           | -3.646034               | -0.224985 | -1.059104 |
| 15            | 6             | 0           | -4.912755               | -0.130187 | -0.639133 |
| 16            | 6             | 0           | -2.706470               | 0.482036  | 1.144896  |
| 17            | 7             | 0           | -2.908444               | 0.817599  | 2.239294  |
| 18            | 1             | 0           | 3.064134                | -4.185898 | 0.129549  |
| 19            | 1             | 0           | 2.146359                | -3.351085 | -2.026600 |
| 20            | 1             | 0           | 0.683771                | -1.351143 | -2.063772 |
| 21            | 1             | 0           | 1.048415                | -1.001926 | 2.201117  |
| 22            | 1             | 0           | 2.506893                | -3.001447 | 2.245711  |
| 23            | 1             | 0           | -0.330244               | 0.489635  | 1.085635  |
| 24            | 1             | 0           | -0.108269               | 2.263759  | -0.666066 |
| 25            | 1             | 0           | 0.877310                | 1.179099  | -1.641607 |
| 26            | 1             | 0           | 2.568302                | 1.071365  | 0.236946  |
| 27            | 1             | 0           | 1.587374                | 2.191241  | 1.182235  |
| 28            | 1             | 0           | 2.910765                | 2.879443  | -1.529420 |
| 29            | 1             | 0           | 3.190508                | 5.087287  | -0.536134 |
| 30            | 1             | 0           | 2.338324                | 4.525344  | 1.006354  |
| 31            | 1             | 0           | -3.402481               | -0.532576 | -2.072477 |

|    |   |   |           |           |           |
|----|---|---|-----------|-----------|-----------|
| 32 | 1 | 0 | -5.740085 | -0.359423 | -1.303208 |
| 33 | 1 | 0 | -5.165323 | 0.175932  | 0.372594  |

### 3b

| Center Number | Atomic Number | Atomic Type | Coordinates (Angstroms) |           |           |
|---------------|---------------|-------------|-------------------------|-----------|-----------|
|               |               |             | X                       | Y         | Z         |
| 1             | 6             | 0           | -4.406787               | 0.148096  | -0.279143 |
| 2             | 6             | 0           | -3.868511               | 0.064924  | 1.005233  |
| 3             | 6             | 0           | -2.484018               | 0.079807  | 1.186126  |
| 4             | 6             | 0           | -1.623011               | 0.186924  | 0.088634  |
| 5             | 6             | 0           | -2.170698               | 0.265459  | -1.198953 |
| 6             | 6             | 0           | -3.553111               | 0.245657  | -1.380646 |
| 7             | 6             | 0           | -0.115085               | 0.249774  | 0.309689  |
| 8             | 7             | 0           | 0.539734                | -0.643514 | -0.640675 |
| 9             | 6             | 0           | 0.422700                | 1.684783  | 0.095494  |
| 10            | 6             | 0           | 1.925941                | 1.833759  | 0.393702  |
| 11            | 6             | 0           | 2.387230                | 3.263078  | 0.298355  |
| 12            | 6             | 0           | 3.296018                | 3.721584  | -0.562878 |
| 13            | 6             | 0           | 1.217991                | -1.660121 | -0.253433 |
| 14            | 6             | 0           | 1.853268                | -2.540661 | -1.246168 |
| 15            | 6             | 0           | 2.587517                | -3.620093 | -0.953469 |
| 16            | 6             | 0           | 1.407712                | -2.011943 | 1.154328  |
| 17            | 7             | 0           | 1.566080                | -2.297067 | 2.269970  |
| 18            | 1             | 0           | -5.483933               | 0.131910  | -0.422305 |
| 19            | 1             | 0           | -4.523861               | -0.018389 | 1.868247  |
| 20            | 1             | 0           | -2.069645               | 0.005747  | 2.189082  |
| 21            | 1             | 0           | -1.507843               | 0.326304  | -2.056745 |
| 22            | 1             | 0           | -3.965033               | 0.304331  | -2.384814 |
| 23            | 1             | 0           | 0.092052                | -0.039392 | 1.351818  |
| 24            | 1             | 0           | -0.155504               | 2.351056  | 0.748556  |
| 25            | 1             | 0           | 0.216498                | 1.992363  | -0.936123 |
| 26            | 1             | 0           | 2.505133                | 1.211968  | -0.299116 |
| 27            | 1             | 0           | 2.124189                | 1.451624  | 1.407376  |
| 28            | 1             | 0           | 1.915842                | 3.961190  | 0.992918  |
| 29            | 1             | 0           | 3.584536                | 4.769059  | -0.588307 |
| 30            | 1             | 0           | 3.790748                | 3.064077  | -1.275324 |
| 31            | 1             | 0           | 1.673207                | -2.234339 | -2.273121 |
| 32            | 1             | 0           | 3.027774                | -4.225985 | -1.739011 |
| 33            | 1             | 0           | 2.772212                | -3.933611 | 0.070568  |

### 4a

| Center Number | Atomic Number | Atomic Type | Coordinates (Angstroms) |           |           |
|---------------|---------------|-------------|-------------------------|-----------|-----------|
|               |               |             | X                       | Y         | Z         |
| 1             | 6             | 0           | -1.460153               | 1.233392  | -0.165267 |
| 2             | 6             | 0           | -2.603163               | 1.490410  | 0.519559  |
| 3             | 6             | 0           | -3.465214               | 0.386783  | 1.074970  |
| 4             | 6             | 0           | -2.743899               | -0.976042 | 1.047776  |
| 5             | 6             | 0           | -1.985090               | -1.151674 | -0.272163 |
| 6             | 7             | 0           | -1.034174               | -0.053795 | -0.452747 |
| 7             | 6             | 0           | -1.087626               | -2.384828 | -0.412996 |
| 8             | 6             | 0           | -0.050556               | -1.931721 | -1.455283 |
| 9             | 6             | 0           | 0.211597                | -0.432811 | -1.120219 |
| 10            | 6             | 0           | 1.468837                | -0.219165 | -0.280490 |

|    |   |   |           |           |           |
|----|---|---|-----------|-----------|-----------|
| 11 | 6 | 0 | 2.689388  | 0.007018  | -0.929909 |
| 12 | 6 | 0 | 3.871745  | 0.144138  | -0.203885 |
| 13 | 6 | 0 | 3.849680  | 0.064217  | 1.190123  |
| 14 | 6 | 0 | 2.637700  | -0.149177 | 1.847483  |
| 15 | 6 | 0 | 1.456119  | -0.289044 | 1.116953  |
| 16 | 6 | 0 | -0.659143 | 2.324333  | -0.651929 |
| 17 | 7 | 0 | -0.023136 | 3.212426  | -1.052133 |
| 18 | 1 | 0 | -2.897824 | 2.522501  | 0.672076  |
| 19 | 1 | 0 | -3.759880 | 0.628545  | 2.105511  |
| 20 | 1 | 0 | -4.407445 | 0.326675  | 0.508749  |
| 21 | 1 | 0 | -2.025327 | -1.033096 | 1.875005  |
| 22 | 1 | 0 | -3.461721 | -1.793465 | 1.182289  |
| 23 | 1 | 0 | -2.722315 | -1.136917 | -1.096201 |
| 24 | 1 | 0 | -0.601347 | -2.605406 | 0.545014  |
| 25 | 1 | 0 | -1.643545 | -3.274664 | -0.723671 |
| 26 | 1 | 0 | -0.477221 | -2.008525 | -2.462393 |
| 27 | 1 | 0 | 0.870987  | -2.518360 | -1.434583 |
| 28 | 1 | 0 | 0.335754  | 0.135253  | -2.052849 |
| 29 | 1 | 0 | 2.711426  | 0.084570  | -2.015166 |
| 30 | 1 | 0 | 4.807940  | 0.324957  | -0.725547 |
| 31 | 1 | 0 | 4.768467  | 0.178350  | 1.759076  |
| 32 | 1 | 0 | 2.608703  | -0.201102 | 2.932898  |
| 33 | 1 | 0 | 0.513192  | -0.434705 | 1.635614  |

4a'

| Center<br>Number | Atomic<br>Number | Atomic<br>Type | Coordinates (Angstroms) |           |           |
|------------------|------------------|----------------|-------------------------|-----------|-----------|
|                  |                  |                | X                       | Y         | Z         |
| 1                | 6                | 0              | 1.293829                | 1.231432  | -0.091657 |
| 2                | 6                | 0              | 2.481672                | 1.768179  | 0.285288  |
| 3                | 6                | 0              | 3.620023                | 0.893213  | 0.728201  |
| 4                | 6                | 0              | 3.456764                | -0.510632 | 0.124786  |
| 5                | 6                | 0              | 2.055716                | -1.070758 | 0.395464  |
| 6                | 7                | 0              | 0.987699                | -0.121402 | 0.011218  |
| 7                | 6                | 0              | 1.700097                | -2.336648 | -0.398379 |
| 8                | 6                | 0              | 0.173409                | -2.270186 | -0.508005 |
| 9                | 6                | 0              | -0.131749               | -0.763628 | -0.700685 |
| 10               | 6                | 0              | -1.511622               | -0.387283 | -0.180935 |
| 11               | 6                | 0              | -2.584974               | -0.282733 | -1.071495 |
| 12               | 6                | 0              | -3.873247               | -0.014697 | -0.606984 |
| 13               | 6                | 0              | -4.101649               | 0.160125  | 0.758332  |
| 14               | 6                | 0              | -3.034347               | 0.064885  | 1.654102  |
| 15               | 6                | 0              | -1.749226               | -0.209099 | 1.187543  |
| 16               | 6                | 0              | 0.288824                | 2.112516  | -0.625021 |
| 17               | 7                | 0              | -0.476027               | 2.860717  | -1.081730 |
| 18               | 1                | 0              | 2.611871                | 2.842043  | 0.219878  |
| 19               | 1                | 0              | 4.574690                | 1.330051  | 0.409272  |
| 20               | 1                | 0              | 3.669316                | 0.831526  | 1.826647  |
| 21               | 1                | 0              | 3.616720                | -0.454206 | -0.959459 |
| 22               | 1                | 0              | 4.202947                | -1.203749 | 0.529859  |
| 23               | 1                | 0              | 1.969512                | -1.276142 | 1.474892  |
| 24               | 1                | 0              | 2.159465                | -2.285575 | -1.393998 |
| 25               | 1                | 0              | 2.057609                | -3.249040 | 0.089558  |
| 26               | 1                | 0              | -0.292637               | -2.616597 | 0.421284  |
| 27               | 1                | 0              | -0.236667               | -2.868527 | -1.326538 |
| 28               | 1                | 0              | -0.089396               | -0.519040 | -1.773692 |
| 29               | 1                | 0              | -2.409332               | -0.401446 | -2.138603 |
| 30               | 1                | 0              | -4.694868               | 0.069532  | -1.313335 |



|    |   |   |           |           |          |
|----|---|---|-----------|-----------|----------|
| 31 | 1 | 0 | -5.102323 | 0.378143  | 1.121710 |
| 32 | 1 | 0 | -3.202247 | 0.209300  | 2.718310 |
| 33 | 1 | 0 | -0.917475 | -0.269595 | 1.884471 |

**4b**

| Center Number | Atomic Number | Atomic Type | Coordinates (Angstroms) |           |           |
|---------------|---------------|-------------|-------------------------|-----------|-----------|
|               |               |             | X                       | Y         | Z         |
| 1             | 6             | 0           | -1.293606               | 1.231536  | -0.091469 |
| 2             | 6             | 0           | -2.481438               | 1.768356  | 0.285474  |
| 3             | 6             | 0           | -3.620075               | 0.893516  | 0.727848  |
| 4             | 6             | 0           | -3.456790               | -0.510345 | 0.124551  |
| 5             | 6             | 0           | -2.055821               | -1.070572 | 0.395301  |
| 6             | 7             | 0           | -0.987832               | -0.121410 | 0.010772  |
| 7             | 6             | 0           | -1.700320               | -2.336634 | -0.398255 |
| 8             | 6             | 0           | -0.173649               | -2.270319 | -0.507985 |
| 9             | 6             | 0           | 0.131685                | -0.763825 | -0.700885 |
| 10            | 6             | 0           | 1.511557                | -0.387500 | -0.181112 |
| 11            | 6             | 0           | 2.584761                | -0.282057 | -1.071736 |
| 12            | 6             | 0           | 3.873026                | -0.013997 | -0.607204 |
| 13            | 6             | 0           | 4.101556                | 0.159948  | 0.758199  |
| 14            | 6             | 0           | 3.034396                | 0.063800  | 1.654050  |
| 15            | 6             | 0           | 1.749299                | -0.210223 | 1.187468  |
| 16            | 6             | 0           | -0.288382               | 2.112685  | -0.624292 |
| 17            | 7             | 0           | 0.476655                | 2.860959  | -1.080568 |
| 18            | 1             | 0           | -2.611255               | 2.842319  | 0.220759  |
| 19            | 1             | 0           | -3.670207               | 0.832060  | 1.826278  |
| 20            | 1             | 0           | -4.574504               | 1.330388  | 0.408225  |
| 21            | 1             | 0           | -4.202995               | -1.203423 | 0.529635  |
| 22            | 1             | 0           | -3.616760               | -0.453979 | -0.959698 |
| 23            | 1             | 0           | -1.969636               | -1.275744 | 1.474779  |
| 24            | 1             | 0           | -2.057858               | -3.248893 | 0.089942  |
| 25            | 1             | 0           | -2.159742               | -2.285796 | -1.393861 |
| 26            | 1             | 0           | 0.236334                | -2.868787 | -1.326490 |
| 27            | 1             | 0           | 0.292417                | -2.616680 | 0.421319  |
| 28            | 1             | 0           | 0.089433                | -0.519423 | -1.773945 |
| 29            | 1             | 0           | 2.409012                | -0.400084 | -2.138902 |
| 30            | 1             | 0           | 4.694531                | 0.070943  | -1.313606 |
| 31            | 1             | 0           | 5.102217                | 0.377987  | 1.121601  |
| 32            | 1             | 0           | 3.202400                | 0.207524  | 2.718336  |
| 33            | 1             | 0           | 0.917662                | -0.271469 | 1.884473  |

**4b'**

| Center Number | Atomic Number | Atomic Type | Coordinates (Angstroms) |           |           |
|---------------|---------------|-------------|-------------------------|-----------|-----------|
|               |               |             | X                       | Y         | Z         |
| 1             | 6             | 0           | 1.460201                | 1.233079  | -0.166148 |
| 2             | 6             | 0           | 2.602436                | 1.490192  | 0.519988  |
| 3             | 6             | 0           | 3.464044                | 0.386555  | 1.075981  |
| 4             | 6             | 0           | 2.742214                | -0.976106 | 1.048790  |
| 5             | 6             | 0           | 1.984576                | -1.152288 | -0.271792 |
| 6             | 7             | 0           | 1.034662                | -0.053911 | -0.454532 |
| 7             | 6             | 0           | 1.086412                | -2.385035 | -0.412253 |
| 8             | 6             | 0           | 0.050178                | -1.932081 | -1.455411 |
| 9             | 6             | 0           | -0.211631               | -0.433012 | -1.120934 |

|    |   |   |           |           |           |
|----|---|---|-----------|-----------|-----------|
| 10 | 6 | 0 | -1.468419 | -0.218984 | -0.280595 |
| 11 | 6 | 0 | -2.689509 | 0.005653  | -0.929560 |
| 12 | 6 | 0 | -3.871487 | 0.143100  | -0.203000 |
| 13 | 6 | 0 | -3.848522 | 0.065086  | 1.191110  |
| 14 | 6 | 0 | -2.636026 | -0.146739 | 1.847999  |
| 15 | 6 | 0 | -1.454808 | -0.286951 | 1.116926  |
| 16 | 6 | 0 | 0.659707  | 2.324016  | -0.653565 |
| 17 | 7 | 0 | 0.024067  | 3.212094  | -1.054378 |
| 18 | 1 | 0 | 2.896909  | 2.522299  | 0.672785  |
| 19 | 1 | 0 | 4.406554  | 0.325964  | 0.510248  |
| 20 | 1 | 0 | 3.758244  | 0.628387  | 2.106643  |
| 21 | 1 | 0 | 3.459574  | -1.793746 | 1.184439  |
| 22 | 1 | 0 | 2.022923  | -1.032409 | 1.875447  |
| 23 | 1 | 0 | 2.722703  | -1.138861 | -1.095039 |
| 24 | 1 | 0 | 1.641990  | -3.275446 | -0.721898 |
| 25 | 1 | 0 | 0.599377  | -2.604577 | 0.545615  |
| 26 | 1 | 0 | -0.871573 | -2.518422 | -1.435087 |
| 27 | 1 | 0 | 0.477485  | -2.009318 | -2.462224 |
| 28 | 1 | 0 | -0.336262 | 0.134689  | -2.053716 |
| 29 | 1 | 0 | -2.712268 | 0.081706  | -2.014912 |
| 30 | 1 | 0 | -4.808104 | 0.322686  | -0.724333 |
| 31 | 1 | 0 | -4.767024 | 0.179472  | 1.760473  |
| 32 | 1 | 0 | -2.606322 | -0.197185 | 2.933467  |
| 33 | 1 | 0 | -0.511510 | -0.431429 | 1.635250  |

5

| Center<br>Number | Atomic<br>Number | Atomic<br>Type | Coordinates (Angstroms) |           |           |
|------------------|------------------|----------------|-------------------------|-----------|-----------|
|                  |                  |                | X                       | Y         | Z         |
| 1                | 6                | 0              | -4.526293               | -0.639975 | -0.204194 |
| 2                | 6                | 0              | -3.662074               | -1.640162 | -0.660215 |
| 3                | 6                | 0              | -2.287182               | -1.501737 | -0.507308 |
| 4                | 6                | 0              | -1.738207               | -0.360737 | 0.108053  |
| 5                | 6                | 0              | -2.619349               | 0.636865  | 0.559364  |
| 6                | 6                | 0              | -3.999193               | 0.497456  | 0.405744  |
| 7                | 6                | 0              | -0.255814               | -0.246126 | 0.260225  |
| 8                | 7                | 0              | 0.422915                | -1.309483 | -0.007925 |
| 9                | 6                | 0              | 0.322159                | 1.077134  | 0.732828  |
| 10               | 6                | 0              | 0.327505                | 2.185684  | -0.354231 |
| 11               | 6                | 0              | 0.849910                | 3.489052  | 0.188621  |
| 12               | 6                | 0              | 2.019874                | 4.033908  | -0.146911 |
| 13               | 6                | 0              | 1.822618                | -1.417029 | 0.005526  |
| 14               | 6                | 0              | 2.400483                | -2.565699 | 0.429523  |
| 15               | 6                | 0              | 3.864004                | -2.860804 | 0.486712  |
| 16               | 6                | 0              | 2.650862                | -0.374589 | -0.554885 |
| 17               | 7                | 0              | 3.305286                | 0.453584  | -1.046867 |
| 18               | 1                | 0              | -5.600863               | -0.747442 | -0.325411 |
| 19               | 1                | 0              | -4.063415               | -2.528895 | -1.139976 |
| 20               | 1                | 0              | -1.609501               | -2.271460 | -0.858679 |
| 21               | 1                | 0              | -2.239972               | 1.531068  | 1.041758  |
| 22               | 1                | 0              | -4.660574               | 1.280854  | 0.765681  |
| 23               | 1                | 0              | 1.343468                | 0.930264  | 1.090850  |
| 24               | 1                | 0              | -0.254047               | 1.423545  | 1.599439  |
| 25               | 1                | 0              | -0.693236               | 2.318936  | -0.736240 |
| 26               | 1                | 0              | 0.946823                | 1.859735  | -1.195114 |
| 27               | 1                | 0              | 0.216125                | 3.991866  | 0.922151  |
| 28               | 1                | 0              | 2.357120                | 4.973000  | 0.284361  |
| 29               | 1                | 0              | 2.685692                | 3.553882  | -0.860653 |

|    |   |   |          |           |           |
|----|---|---|----------|-----------|-----------|
| 30 | 1 | 0 | 1.714464 | -3.336466 | 0.775417  |
| 31 | 1 | 0 | 4.093927 | -3.769833 | -0.085221 |
| 32 | 1 | 0 | 4.470313 | -2.041289 | 0.091615  |
| 33 | 1 | 0 | 4.180457 | -3.055912 | 1.520446  |

### TS2a

| Center Number | Atomic Number | Atomic Type | Coordinates (Angstroms) |           |           |
|---------------|---------------|-------------|-------------------------|-----------|-----------|
|               |               |             | X                       | Y         | Z         |
| 1             | 6             | 0           | 2.209122                | -1.317872 | -0.351882 |
| 2             | 6             | 0           | 0.897897                | -1.725398 | -0.153541 |
| 3             | 7             | 0           | -0.247707               | 0.074870  | 0.638796  |
| 4             | 6             | 0           | 0.350181                | 1.176607  | 0.218067  |
| 5             | 6             | 0           | 1.742268                | 1.358148  | 0.404665  |
| 6             | 6             | 0           | 2.482950                | 0.331968  | 0.971295  |
| 7             | 6             | 0           | -0.200071               | -1.814521 | -1.178004 |
| 8             | 6             | 0           | -1.558633               | -1.613193 | -0.497315 |
| 9             | 6             | 0           | -1.603254               | -0.217559 | 0.172254  |
| 10            | 6             | 0           | -2.589978               | -0.170965 | 1.344871  |
| 11            | 6             | 0           | -0.324647               | 2.178464  | -0.594451 |
| 12            | 7             | 0           | -0.858303               | 3.002593  | -1.219000 |
| 13            | 1             | 0           | 2.228992                | 2.168681  | -0.129010 |
| 14            | 1             | 0           | 3.565694                | 0.421736  | 1.012658  |
| 15            | 1             | 0           | 2.032656                | -0.255769 | 1.763200  |
| 16            | 1             | 0           | 2.504867                | -0.889053 | -1.306401 |
| 17            | 1             | 0           | 3.002506                | -1.831061 | 0.184200  |
| 18            | 1             | 0           | 0.704597                | -2.299106 | 0.752413  |
| 19            | 1             | 0           | -0.171677               | -2.808483 | -1.651306 |
| 20            | 1             | 0           | -0.040678               | -1.082244 | -1.980612 |
| 21            | 1             | 0           | -2.390700               | -1.722733 | -1.202240 |
| 22            | 1             | 0           | -1.686185               | -2.388831 | 0.270743  |
| 23            | 1             | 0           | -1.927701               | 0.510689  | -0.585856 |
| 24            | 1             | 0           | -2.657761               | 0.840174  | 1.759193  |
| 25            | 1             | 0           | -3.591028               | -0.472841 | 1.015122  |
| 26            | 1             | 0           | -2.266519               | -0.847468 | 2.143575  |

### TS2a'

| Center Number | Atomic Number | Atomic Type | Coordinates (Angstroms) |           |           |
|---------------|---------------|-------------|-------------------------|-----------|-----------|
|               |               |             | X                       | Y         | Z         |
| 1             | 6             | 0           | -2.517100               | -0.833822 | 0.287328  |
| 2             | 6             | 0           | -1.294366               | -1.459114 | 0.085541  |
| 3             | 7             | 0           | 0.073147                | -0.024783 | -0.895890 |
| 4             | 6             | 0           | -0.043288               | 1.113866  | -0.235294 |
| 5             | 6             | 0           | -1.321204               | 1.732552  | -0.181602 |
| 6             | 6             | 0           | -2.394044               | 1.088824  | -0.769900 |
| 7             | 6             | 0           | -0.259420               | -1.642983 | 1.171129  |
| 8             | 6             | 0           | 1.203825                | -1.559498 | 0.651025  |
| 9             | 6             | 0           | 1.229258                | -0.915961 | -0.760866 |
| 10            | 6             | 0           | 2.586720                | -0.314373 | -1.147785 |
| 11            | 6             | 0           | 0.975515                | 1.686587  | 0.627256  |
| 12            | 7             | 0           | 1.779099                | 2.168275  | 1.318196  |
| 13            | 1             | 0           | -1.469557               | 2.553993  | 0.513118  |
| 14            | 1             | 0           | -3.397549               | 1.487530  | -0.646184 |
| 15            | 1             | 0           | -2.214914               | 0.499459  | -1.661181 |

|    |   |   |           |           |           |
|----|---|---|-----------|-----------|-----------|
| 16 | 1 | 0 | -2.758503 | -0.427413 | 1.265638  |
| 17 | 1 | 0 | -3.371279 | -1.119696 | -0.319207 |
| 18 | 1 | 0 | -1.201998 | -2.109446 | -0.781589 |
| 19 | 1 | 0 | -0.423297 | -2.610598 | 1.667096  |
| 20 | 1 | 0 | -0.431090 | -0.881939 | 1.942096  |
| 21 | 1 | 0 | 1.808101  | -0.971817 | 1.351276  |
| 22 | 1 | 0 | 1.667769  | -2.551465 | 0.595237  |
| 23 | 1 | 0 | 1.026944  | -1.718066 | -1.483232 |
| 24 | 1 | 0 | 3.344153  | -1.106975 | -1.152232 |
| 25 | 1 | 0 | 2.542263  | 0.114510  | -2.154461 |
| 26 | 1 | 0 | 2.917860  | 0.461003  | -0.453510 |

**TS2b**

| Center<br>Number | Atomic<br>Number | Atomic<br>Type | Coordinates (Angstroms) |           |           |
|------------------|------------------|----------------|-------------------------|-----------|-----------|
|                  |                  |                | X                       | Y         | Z         |
| 1                | 6                | 0              | 2.517039                | -0.833952 | 0.287361  |
| 2                | 6                | 0              | 1.294305                | -1.459212 | 0.085532  |
| 3                | 7                | 0              | -0.073172               | -0.024711 | -0.895964 |
| 4                | 6                | 0              | 0.043356                | 1.113904  | -0.235316 |
| 5                | 6                | 0              | 1.321313                | 1.732525  | -0.181633 |
| 6                | 6                | 0              | 2.394154                | 1.088738  | -0.769901 |
| 7                | 6                | 0              | 0.259322                | -1.643069 | 1.171095  |
| 8                | 6                | 0              | -1.203934               | -1.559342 | 0.651016  |
| 9                | 6                | 0              | -1.229325               | -0.915862 | -0.760908 |
| 10               | 6                | 0              | -2.586789               | -0.314215 | -1.147835 |
| 11               | 6                | 0              | -0.975384               | 1.686570  | 0.627342  |
| 12               | 7                | 0              | -1.778954               | 2.168178  | 1.318353  |
| 13               | 1                | 0              | 1.469689                | 2.553966  | 0.513077  |
| 14               | 1                | 0              | 2.215082                | 0.499523  | -1.661284 |
| 15               | 1                | 0              | 3.397685                | 1.487319  | -0.645996 |
| 16               | 1                | 0              | 3.371208                | -1.119765 | -0.319213 |
| 17               | 1                | 0              | 2.758441                | -0.427611 | 1.265698  |
| 18               | 1                | 0              | 1.201944                | -2.109566 | -0.781582 |
| 19               | 1                | 0              | 0.423073                | -2.610794 | 1.666895  |
| 20               | 1                | 0              | 0.431096                | -0.882158 | 1.942171  |
| 21               | 1                | 0              | -1.808078               | -0.971502 | 1.351254  |
| 22               | 1                | 0              | -1.668075               | -2.551221 | 0.595314  |
| 23               | 1                | 0              | -1.027054               | -1.718003 | -1.483245 |
| 24               | 1                | 0              | -3.344277               | -1.106768 | -1.152101 |
| 25               | 1                | 0              | -2.542378               | 0.114517  | -2.154579 |
| 26               | 1                | 0              | -2.917818               | 0.461290  | -0.453653 |

**TS2b'**

| Center<br>Number | Atomic<br>Number | Atomic<br>Type | Coordinates (Angstroms) |           |           |
|------------------|------------------|----------------|-------------------------|-----------|-----------|
|                  |                  |                | X                       | Y         | Z         |
| 1                | 6                | 0              | -2.211432               | -1.315710 | -0.351434 |
| 2                | 6                | 0              | -0.900508               | -1.724421 | -0.152968 |
| 3                | 7                | 0              | 0.247922                | 0.074652  | 0.639075  |
| 4                | 6                | 0              | -0.348370               | 1.177273  | 0.218144  |
| 5                | 6                | 0              | -1.740241               | 1.360669  | 0.404080  |
| 6                | 6                | 0              | -2.482684               | 0.335715  | 0.970750  |
| 7                | 6                | 0              | 0.196916                | -1.814530 | -1.177816 |
| 8                | 6                | 0              | 1.555957                | -1.615345 | -0.497604 |

|    |   |   |           |           |           |
|----|---|---|-----------|-----------|-----------|
| 9  | 6 | 0 | 1.602946  | -0.219826 | 0.172036  |
| 10 | 6 | 0 | 2.590370  | -0.175009 | 1.344147  |
| 11 | 6 | 0 | 0.328063  | 2.178274  | -0.594107 |
| 12 | 7 | 0 | 0.863017  | 3.001980  | -1.218103 |
| 13 | 1 | 0 | -2.225458 | 2.171989  | -0.129773 |
| 14 | 1 | 0 | -2.033272 | -0.252532 | 1.762784  |
| 15 | 1 | 0 | -3.565278 | 0.427316  | 1.012045  |
| 16 | 1 | 0 | -3.005104 | -1.827712 | 0.185366  |
| 17 | 1 | 0 | -2.506794 | -0.887295 | -1.306251 |
| 18 | 1 | 0 | -0.707641 | -2.298208 | 0.753027  |
| 19 | 1 | 0 | 0.167040  | -2.808045 | -1.651978 |
| 20 | 1 | 0 | 0.038128  | -1.081401 | -1.979777 |
| 21 | 1 | 0 | 2.387543  | -1.725968 | -1.202934 |
| 22 | 1 | 0 | 1.682765  | -2.391251 | 0.270295  |
| 23 | 1 | 0 | 1.928247  | 0.507835  | -0.586258 |
| 24 | 1 | 0 | 2.659222  | 0.835680  | 1.759391  |
| 25 | 1 | 0 | 3.590970  | -0.477329 | 1.013455  |
| 26 | 1 | 0 | 2.266955  | -0.852031 | 2.142433  |

**TS4a**

| Center<br>Number | Atomic<br>Number | Atomic<br>Type | Coordinates (Angstroms) |           |           |
|------------------|------------------|----------------|-------------------------|-----------|-----------|
|                  |                  |                | X                       | Y         | Z         |
| 1                | 6                | 0              | -1.464573               | 1.208375  | 0.394804  |
| 2                | 6                | 0              | -2.524797               | 1.092957  | 1.330412  |
| 3                | 6                | 0              | -2.766841               | -0.148440 | 1.891805  |
| 4                | 6                | 0              | -3.215711               | -1.549111 | 0.235239  |
| 5                | 6                | 0              | -2.300799               | -1.265568 | -0.768488 |
| 6                | 7                | 0              | -0.829942               | 0.102491  | 0.057268  |
| 7                | 6                | 0              | -1.113898               | -2.098576 | -1.171346 |
| 8                | 6                | 0              | -0.060607               | -1.197537 | -1.832943 |
| 9                | 6                | 0              | 0.235065                | 0.053215  | -0.933424 |
| 10               | 6                | 0              | 1.594520                | -0.039899 | -0.244505 |
| 11               | 6                | 0              | 2.679863                | 0.677149  | -0.761209 |
| 12               | 6                | 0              | 3.946370                | 0.571659  | -0.183282 |
| 13               | 6                | 0              | 4.142642                | -0.250545 | 0.926643  |
| 14               | 6                | 0              | 3.063441                | -0.962231 | 1.455227  |
| 15               | 6                | 0              | 1.799216                | -0.857214 | 0.875280  |
| 16               | 6                | 0              | -1.241146               | 2.475928  | -0.274238 |
| 17               | 7                | 0              | -1.032489               | 3.483397  | -0.817949 |
| 18               | 1                | 0              | -3.232858               | 1.910741  | 1.427218  |
| 19               | 1                | 0              | -1.919861               | -0.803086 | 2.058524  |
| 20               | 1                | 0              | -3.627400               | -0.293522 | 2.538979  |
| 21               | 1                | 0              | -3.088788               | -2.442016 | 0.843293  |
| 22               | 1                | 0              | -4.234169               | -1.188566 | 0.142450  |
| 23               | 1                | 0              | -2.622697               | -0.549069 | -1.524650 |
| 24               | 1                | 0              | -0.707310               | -2.614996 | -0.293854 |
| 25               | 1                | 0              | -1.422284               | -2.877065 | -1.884790 |
| 26               | 1                | 0              | -0.453334               | -0.849001 | -2.796760 |
| 27               | 1                | 0              | 0.860789                | -1.747241 | -2.046327 |
| 28               | 1                | 0              | 0.250021                | 0.949336  | -1.571342 |
| 29               | 1                | 0              | 2.531629                | 1.327904  | -1.620129 |
| 30               | 1                | 0              | 4.776279                | 1.138681  | -0.596938 |
| 31               | 1                | 0              | 5.126435                | -0.330643 | 1.381384  |
| 32               | 1                | 0              | 3.205174                | -1.597881 | 2.325703  |
| 33               | 1                | 0              | 0.958911                | -1.395772 | 1.302166  |

**TS4a'**

| Center<br>Number | Atomic<br>Number | Atomic<br>Type | Coordinates (Angstroms) |           |           |
|------------------|------------------|----------------|-------------------------|-----------|-----------|
|                  |                  |                | X                       | Y         | Z         |
| 1                | 6                | 0              | -1.475811               | 1.089782  | -0.510793 |
| 2                | 6                | 0              | -2.648290               | 1.024690  | -1.301146 |
| 3                | 6                | 0              | -3.053393               | -0.202556 | -1.803712 |
| 4                | 6                | 0              | -3.367190               | -1.405803 | -0.071143 |
| 5                | 6                | 0              | -2.097419               | -1.669875 | 0.420986  |
| 6                | 7                | 0              | -0.737479               | 0.010649  | -0.311722 |
| 7                | 6                | 0              | -1.553226               | -1.339987 | 1.783961  |
| 8                | 6                | 0              | -0.036092               | -1.141046 | 1.700259  |
| 9                | 6                | 0              | 0.279161                | 0.041682  | 0.740246  |
| 10               | 6                | 0              | 1.688687                | -0.052361 | 0.170462  |
| 11               | 6                | 0              | 2.728459                | 0.668058  | 0.768404  |
| 12               | 6                | 0              | 4.037161                | 0.558689  | 0.293953  |
| 13               | 6                | 0              | 4.320141                | -0.269331 | -0.792518 |
| 14               | 6                | 0              | 3.286102                | -0.984384 | -1.401676 |
| 15               | 6                | 0              | 1.980492                | -0.877636 | -0.923464 |
| 16               | 6                | 0              | -1.245156               | 2.343227  | 0.191717  |
| 17               | 7                | 0              | -1.060172               | 3.358660  | 0.728797  |
| 18               | 1                | 0              | -3.330319               | 1.868873  | -1.275025 |
| 19               | 1                | 0              | -4.010245               | -0.274860 | -2.314803 |
| 20               | 1                | 0              | -2.295431               | -0.905157 | -2.130843 |
| 21               | 1                | 0              | -4.053896               | -0.789440 | 0.504107  |
| 22               | 1                | 0              | -3.841718               | -2.142349 | -0.713453 |
| 23               | 1                | 0              | -1.522744               | -2.426447 | -0.112636 |
| 24               | 1                | 0              | -2.054496               | -0.455207 | 2.198346  |
| 25               | 1                | 0              | -1.771853               | -2.173348 | 2.470075  |
| 26               | 1                | 0              | 0.423132                | -2.056216 | 1.305758  |
| 27               | 1                | 0              | 0.413453                | -0.956468 | 2.682101  |
| 28               | 1                | 0              | 0.214631                | 0.968524  | 1.327818  |
| 29               | 1                | 0              | 2.511899                | 1.325231  | 1.607888  |
| 30               | 1                | 0              | 4.832082                | 1.127628  | 0.769134  |
| 31               | 1                | 0              | 5.336915                | -0.351740 | -1.167331 |
| 32               | 1                | 0              | 3.496484                | -1.624006 | -2.255196 |
| 33               | 1                | 0              | 1.173917                | -1.419063 | -1.408678 |

**TS4b**

| Center<br>Number | Atomic<br>Number | Atomic<br>Type | Coordinates (Angstroms) |           |           |
|------------------|------------------|----------------|-------------------------|-----------|-----------|
|                  |                  |                | X                       | Y         | Z         |
| 1                | 6                | 0              | 1.475272                | 1.089946  | -0.510571 |
| 2                | 6                | 0              | 2.647595                | 1.025781  | -1.301184 |
| 3                | 6                | 0              | 3.053343                | -0.201065 | -1.804111 |
| 4                | 6                | 0              | 3.367682                | -1.404441 | -0.071794 |
| 5                | 6                | 0              | 2.098075                | -1.669526 | 0.420269  |
| 6                | 7                | 0              | 0.737506                | 0.010388  | -0.311597 |
| 7                | 6                | 0              | 1.553724                | -1.340821 | 1.783501  |
| 8                | 6                | 0              | 0.036523                | -1.142467 | 1.699697  |
| 9                | 6                | 0              | -0.278984               | 0.040798  | 0.740557  |
| 10               | 6                | 0              | -1.688566               | -0.052855 | 0.170803  |
| 11               | 6                | 0              | -2.727773               | 0.669665  | 0.767141  |
| 12               | 6                | 0              | -4.036494               | 0.560628  | 0.292622  |
| 13               | 6                | 0              | -4.319995               | -0.269049 | -0.792433 |
| 14               | 6                | 0              | -3.286475               | -0.986150 | -1.400094 |

|    |   |   |           |           |           |
|----|---|---|-----------|-----------|-----------|
| 15 | 6 | 0 | -1.980901 | -0.879810 | -0.921739 |
| 16 | 6 | 0 | 1.244213  | 2.343079  | 0.192388  |
| 17 | 7 | 0 | 1.058836  | 3.358279  | 0.729778  |
| 18 | 1 | 0 | 3.329256  | 1.870278  | -1.274873 |
| 19 | 1 | 0 | 2.295814  | -0.904074 | -2.131366 |
| 20 | 1 | 0 | 4.010215  | -0.272702 | -2.315273 |
| 21 | 1 | 0 | 3.842630  | -2.140503 | -0.714367 |
| 22 | 1 | 0 | 4.054055  | -0.787896 | 0.503633  |
| 23 | 1 | 0 | 1.523763  | -2.426218 | -0.113587 |
| 24 | 1 | 0 | 1.772573  | -2.174659 | 2.468958  |
| 25 | 1 | 0 | 2.054602  | -0.456123 | 2.198515  |
| 26 | 1 | 0 | -0.413425 | -0.959100 | 2.681581  |
| 27 | 1 | 0 | -0.422162 | -2.057524 | 1.304261  |
| 28 | 1 | 0 | -0.214612 | 0.967335  | 1.328618  |
| 29 | 1 | 0 | -2.510780 | 1.328237  | 1.605413  |
| 30 | 1 | 0 | -4.831000 | 1.131083  | 0.766678  |
| 31 | 1 | 0 | -5.336753 | -0.351182 | -1.167352 |
| 32 | 1 | 0 | -3.497264 | -1.627078 | -2.252533 |
| 33 | 1 | 0 | -1.174735 | -1.422823 | -1.405870 |

TS4b'

| Center<br>Number | Atomic<br>Number | Atomic<br>Type | Coordinates (Angstroms) |           |           |
|------------------|------------------|----------------|-------------------------|-----------|-----------|
|                  |                  |                | X                       | Y         | Z         |
| 1                | 6                | 0              | -0.993829               | 1.212162  | 0.239758  |
| 2                | 6                | 0              | -2.188023               | 1.954238  | 0.032349  |
| 3                | 6                | 0              | -3.408265               | 1.421472  | 0.424993  |
| 4                | 6                | 0              | -3.620835               | -0.342964 | -0.677302 |
| 5                | 6                | 0              | -2.729211               | -1.229488 | -0.090288 |
| 6                | 7                | 0              | -1.060119               | 0.044150  | 0.848757  |
| 7                | 6                | 0              | -1.596046               | -1.969233 | -0.735593 |
| 8                | 6                | 0              | -0.513001               | -2.260944 | 0.310126  |
| 9                | 6                | 0              | 0.035252                | -0.935648 | 0.936351  |
| 10               | 6                | 0              | 1.424146                | -0.559915 | 0.427307  |
| 11               | 6                | 0              | 2.334852                | 0.018119  | 1.322088  |
| 12               | 6                | 0              | 3.622494                | 0.365061  | 0.915914  |
| 13               | 6                | 0              | 4.024630                | 0.130206  | -0.399233 |
| 14               | 6                | 0              | 3.133581                | -0.457653 | -1.298362 |
| 15               | 6                | 0              | 1.847088                | -0.801895 | -0.887226 |
| 16               | 6                | 0              | 0.172137                | 1.837399  | -0.373567 |
| 17               | 7                | 0              | 0.990454                | 2.497177  | -0.872835 |
| 18               | 1                | 0              | -2.147049               | 2.794253  | -0.653949 |
| 19               | 1                | 0              | -3.449880               | 0.855625  | 1.349543  |
| 20               | 1                | 0              | -4.317535               | 1.961510  | 0.171117  |
| 21               | 1                | 0              | -4.663021               | -0.379892 | -0.371682 |
| 22               | 1                | 0              | -3.459436               | -0.013232 | -1.701134 |
| 23               | 1                | 0              | -3.027806               | -1.639403 | 0.874727  |
| 24               | 1                | 0              | -1.967755               | -2.927321 | -1.133336 |
| 25               | 1                | 0              | -1.206275               | -1.406108 | -1.592959 |
| 26               | 1                | 0              | 0.304792                | -2.858694 | -0.102574 |
| 27               | 1                | 0              | -0.968190               | -2.861510 | 1.107199  |
| 28               | 1                | 0              | 0.149740                | -1.120413 | 2.012568  |
| 29               | 1                | 0              | 2.026440                | 0.201649  | 2.349355  |
| 30               | 1                | 0              | 4.310754                | 0.816302  | 1.625629  |
| 31               | 1                | 0              | 5.026534                | 0.400601  | -0.721407 |
| 32               | 1                | 0              | 3.439756                | -0.645163 | -2.324109 |
| 33               | 1                | 0              | 1.166755                | -1.252997 | -1.604322 |

**6a**

| Center<br>Number | Atomic<br>Number | Atomic<br>Type | Coordinates (Angstroms) |           |           |
|------------------|------------------|----------------|-------------------------|-----------|-----------|
|                  |                  |                | X                       | Y         | Z         |
| 1                | 6                | 0              | 0.539803                | 2.402732  | 0.141573  |
| 2                | 6                | 0              | 1.541094                | 1.491281  | 0.236359  |
| 3                | 7                | 0              | 1.241829                | 0.152860  | 0.039655  |
| 4                | 6                | 0              | -0.060462               | -0.286024 | -0.261368 |
| 5                | 6                | 0              | -1.048776               | 0.824496  | -0.296585 |
| 6                | 7                | 0              | -0.744240               | 2.077490  | -0.118420 |
| 7                | 1                | 0              | 2.566205                | 1.734422  | 0.476400  |
| 8                | 8                | 0              | -0.323147               | -1.464242 | -0.481722 |
| 9                | 17               | 0              | 0.893879                | 4.105229  | 0.389412  |
| 10               | 6                | 0              | 2.322664                | -0.801473 | 0.044699  |
| 11               | 6                | 0              | 3.459357                | -0.545967 | -0.726462 |
| 12               | 6                | 0              | 2.242783                | -1.953412 | 0.831698  |
| 13               | 6                | 0              | 4.529744                | -1.440364 | -0.696585 |
| 14               | 1                | 0              | 3.498025                | 0.337570  | -1.356775 |
| 15               | 6                | 0              | 3.314471                | -2.843672 | 0.848914  |
| 16               | 1                | 0              | 1.351115                | -2.149285 | 1.414480  |
| 17               | 6                | 0              | 4.459792                | -2.589963 | 0.090326  |
| 18               | 1                | 0              | 5.412051                | -1.239750 | -1.297467 |
| 19               | 1                | 0              | 3.253521                | -3.738749 | 1.461214  |
| 20               | 1                | 0              | 5.291472                | -3.288419 | 0.109705  |
| 21               | 8                | 0              | -2.327198               | 0.577151  | -0.612732 |
| 22               | 6                | 0              | -2.988819               | -0.672174 | -0.294311 |
| 23               | 6                | 0              | -4.488630               | -0.387654 | -0.362055 |
| 24               | 1                | 0              | -2.696740               | -1.003554 | 0.706592  |
| 25               | 1                | 0              | -2.686300               | -1.439185 | -1.009046 |
| 26               | 6                | 0              | -5.297395               | -1.639753 | -0.153211 |
| 27               | 1                | 0              | -4.751361               | 0.370388  | 0.384339  |
| 28               | 1                | 0              | -4.705650               | 0.042682  | -1.349933 |
| 29               | 6                | 0              | -6.158997               | -1.835211 | 0.845293  |
| 30               | 1                | 0              | -5.144954               | -2.434722 | -0.885274 |
| 31               | 1                | 0              | -6.718636               | -2.761385 | 0.944786  |
| 32               | 1                | 0              | -6.344833               | -1.071677 | 1.598250  |

**6b**

| Center<br>Number | Atomic<br>Number | Atomic<br>Type | Coordinates (Angstroms) |           |           |
|------------------|------------------|----------------|-------------------------|-----------|-----------|
|                  |                  |                | X                       | Y         | Z         |
| 1                | 6                | 0              | 1.144718                | 2.419843  | 0.238782  |
| 2                | 6                | 0              | 2.010338                | 1.378162  | 0.324077  |
| 3                | 7                | 0              | 1.546254                | 0.104853  | 0.033875  |
| 4                | 6                | 0              | 0.214753                | -0.138378 | -0.347740 |
| 5                | 6                | 0              | -0.613754               | 1.096916  | -0.367423 |
| 6                | 7                | 0              | -0.154495               | 2.285840  | -0.100807 |
| 7                | 1                | 0              | 3.044149                | 1.466433  | 0.625726  |
| 8                | 8                | 0              | -0.190123               | -1.259213 | -0.642104 |
| 9                | 17               | 0              | 1.706472                | 4.042961  | 0.607096  |
| 10               | 6                | 0              | 2.489433                | -0.985696 | 0.033014  |
| 11               | 6                | 0              | 3.687392                | -0.848061 | -0.672706 |
| 12               | 6                | 0              | 2.219009                | -2.152996 | 0.751909  |
| 13               | 6                | 0              | 4.628001                | -1.878185 | -0.644586 |
| 14               | 1                | 0              | 3.873533                | 0.051951  | -1.251271 |
| 15               | 6                | 0              | 3.162057                | -3.178606 | 0.767782  |



|    |   |   |           |           |           |
|----|---|---|-----------|-----------|-----------|
| 16 | 1 | 0 | 1.281038  | -2.255081 | 1.283706  |
| 17 | 6 | 0 | 4.367739  | -3.044449 | 0.075002  |
| 18 | 1 | 0 | 5.558383  | -1.768832 | -1.194314 |
| 19 | 1 | 0 | 2.953207  | -4.085793 | 1.327428  |
| 20 | 1 | 0 | 5.098405  | -3.848016 | 0.092860  |
| 21 | 8 | 0 | -1.895202 | 1.048020  | -0.753184 |
| 22 | 6 | 0 | -2.727549 | -0.130408 | -0.610602 |
| 23 | 6 | 0 | -4.166960 | 0.356815  | -0.712045 |
| 24 | 1 | 0 | -2.525563 | -0.604743 | 0.353413  |
| 25 | 1 | 0 | -2.483424 | -0.845517 | -1.399048 |
| 26 | 6 | 0 | -5.198497 | -0.792904 | -0.698573 |
| 27 | 1 | 0 | -4.372982 | 1.050806  | 0.111191  |
| 28 | 1 | 0 | -4.272821 | 0.923865  | -1.645046 |
| 29 | 6 | 0 | -5.218572 | -1.592638 | 0.578581  |
| 30 | 1 | 0 | -6.193470 | -0.366553 | -0.873800 |
| 31 | 1 | 0 | -4.333223 | -2.194014 | 0.790167  |
| 32 | 1 | 0 | -4.990628 | -1.462944 | -1.546582 |
| 33 | 6 | 0 | -6.228054 | -1.609863 | 1.449865  |
| 34 | 1 | 0 | -7.136360 | -1.033628 | 1.282625  |
| 35 | 1 | 0 | -6.190307 | -2.200892 | 2.361127  |

7a

| Center<br>Number | Atomic<br>Number | Atomic<br>Type | Coordinates (Angstroms) |           |           |
|------------------|------------------|----------------|-------------------------|-----------|-----------|
|                  |                  |                | X                       | Y         | Z         |
| 1                | 6                | 0              | -0.146425               | 0.974280  | 0.809243  |
| 2                | 6                | 0              | -1.837903               | -0.329362 | -0.467667 |
| 3                | 6                | 0              | -0.393410               | -0.891538 | -0.654583 |
| 4                | 6                | 0              | -1.030384               | 1.720735  | -0.181231 |
| 5                | 1                | 0              | 0.603447                | 1.599964  | 1.285445  |
| 6                | 6                | 0              | -2.205224               | -0.403547 | 1.044313  |
| 7                | 1                | 0              | -3.125312               | 0.184896  | 1.134854  |
| 8                | 6                | 0              | -1.081058               | 0.271325  | 1.849296  |
| 9                | 1                | 0              | -1.474098               | 1.002932  | 2.561687  |
| 10               | 1                | 0              | -0.470127               | -0.447306 | 2.405295  |
| 11               | 7                | 0              | 0.506712                | -0.097503 | 0.029899  |
| 12               | 6                | 0              | 1.922827                | -0.266080 | 0.018431  |
| 13               | 6                | 0              | 2.759764                | 0.858540  | 0.019015  |
| 14               | 6                | 0              | 2.487150                | -1.549656 | 0.009883  |
| 15               | 6                | 0              | 4.144866                | 0.700034  | 0.035896  |
| 16               | 1                | 0              | 2.334924                | 1.857268  | -0.018785 |
| 17               | 6                | 0              | 3.873761                | -1.693790 | 0.011342  |
| 18               | 1                | 0              | 1.842419                | -2.417973 | -0.017482 |
| 19               | 6                | 0              | 4.709242                | -0.575852 | 0.032581  |
| 20               | 1                | 0              | 4.781302                | 1.580659  | 0.037039  |
| 21               | 1                | 0              | 4.301077                | -2.692804 | 0.002336  |
| 22               | 1                | 0              | 5.788606                | -0.697442 | 0.039120  |
| 23               | 8                | 0              | -0.140772               | -1.904335 | -1.280867 |
| 24               | 17               | 0              | -0.859835               | 3.461543  | -0.326863 |
| 25               | 7                | 0              | -1.874479               | 1.076301  | -0.869189 |
| 26               | 6                | 0              | -2.552374               | -1.889572 | 1.165272  |
| 27               | 1                | 0              | -3.257388               | -2.102604 | 1.974125  |
| 28               | 1                | 0              | -1.652146               | -2.490375 | 1.335805  |
| 29               | 6                | 0              | -3.159978               | -2.191395 | -0.234441 |
| 30               | 8                | 0              | -2.782256               | -1.111258 | -1.118367 |
| 31               | 1                | 0              | -4.254493               | -2.220757 | -0.212612 |
| 32               | 1                | 0              | -2.787544               | -3.134252 | -0.645361 |

**7a'**

| Center Number | Atomic Number | Atomic Type | Coordinates (Angstroms) |           |           |
|---------------|---------------|-------------|-------------------------|-----------|-----------|
|               |               |             | X                       | Y         | Z         |
| 1             | 6             | 0           | -0.116238               | 0.969550  | 0.630762  |
| 2             | 6             | 0           | -1.638713               | -0.748538 | -0.360723 |
| 3             | 6             | 0           | -0.165132               | -1.121483 | -0.600882 |
| 4             | 6             | 0           | -1.098929               | 1.440635  | -0.420381 |
| 5             | 1             | 0           | 0.583836                | 1.739583  | 0.945409  |
| 6             | 6             | 0           | -1.837600               | -0.718360 | 1.190576  |
| 7             | 1             | 0           | -1.440229               | -1.669061 | 1.562940  |
| 8             | 6             | 0           | -1.030099               | 0.448645  | 1.786181  |
| 9             | 1             | 0           | -1.666005               | 1.267988  | 2.138946  |
| 10            | 1             | 0           | -0.411808               | 0.119225  | 2.626264  |
| 11            | 7             | 0           | 0.626797                | -0.153965 | 0.016207  |
| 12            | 6             | 0           | 2.050740                | -0.205711 | 0.062290  |
| 13            | 6             | 0           | 2.785508                | -0.700585 | -1.024525 |
| 14            | 6             | 0           | 2.727381                | 0.248004  | 1.203458  |
| 15            | 6             | 0           | 4.177391                | -0.733028 | -0.959334 |
| 16            | 1             | 0           | 2.267774                | -1.064847 | -1.901718 |
| 17            | 6             | 0           | 4.120929                | 0.224621  | 1.249832  |
| 18            | 1             | 0           | 2.170169                | 0.604553  | 2.065006  |
| 19            | 6             | 0           | 4.853468                | -0.267559 | 0.169885  |
| 20            | 1             | 0           | 4.736177                | -1.119090 | -1.807470 |
| 21            | 1             | 0           | 4.630304                | 0.582502  | 2.140433  |
| 22            | 1             | 0           | 5.938701                | -0.291398 | 0.208832  |
| 23            | 8             | 0           | 0.229869                | -2.118270 | -1.169657 |
| 24            | 17            | 0           | -1.168934               | 3.149727  | -0.821615 |
| 25            | 7             | 0           | -1.891398               | 0.600587  | -0.928402 |
| 26            | 6             | 0           | -3.369580               | -0.770414 | 1.253719  |
| 27            | 1             | 0           | -3.793294               | 0.232726  | 1.138869  |
| 28            | 1             | 0           | -3.745353               | -1.194874 | 2.189456  |
| 29            | 6             | 0           | -3.711926               | -1.658310 | 0.030132  |
| 30            | 8             | 0           | -2.547891               | -1.676114 | -0.830276 |
| 31            | 1             | 0           | -4.567641               | -1.272564 | -0.533235 |
| 32            | 1             | 0           | -3.917571               | -2.696179 | 0.312620  |

**7b**

| Center Number | Atomic Number | Atomic Type | Coordinates (Angstroms) |           |           |
|---------------|---------------|-------------|-------------------------|-----------|-----------|
|               |               |             | X                       | Y         | Z         |
| 1             | 6             | 0           | 0.180212                | 1.084834  | 0.826786  |
| 2             | 6             | 0           | -1.691025               | 0.013428  | -0.473798 |
| 3             | 6             | 0           | -0.323750               | -0.718504 | -0.671946 |
| 4             | 6             | 0           | -0.594198               | 1.959130  | -0.136962 |
| 5             | 1             | 0           | 1.015061                | 1.583572  | 1.312118  |
| 6             | 6             | 0           | -2.035267               | -0.082577 | 1.051974  |
| 7             | 1             | 0           | -2.932014               | 0.533596  | 1.178524  |
| 8             | 6             | 0           | -0.867801               | 0.557897  | 1.845808  |
| 9             | 1             | 0           | -1.211629               | 1.381919  | 2.479071  |
| 10            | 1             | 0           | -0.373915               | -0.176244 | 2.490757  |
| 11            | 7             | 0           | 0.666269                | -0.068405 | 0.044338  |
| 12            | 6             | 0           | 2.049122                | -0.417867 | 0.006976  |
| 13            | 6             | 0           | 3.024932                | 0.587738  | -0.026904 |
| 14            | 6             | 0           | 2.441186                | -1.763745 | 0.009815  |
| 15            | 6             | 0           | 4.377984                | 0.250126  | -0.033582 |

|    |    |   |           |           |           |
|----|----|---|-----------|-----------|-----------|
| 16 | 1  | 0 | 2.732503  | 1.632796  | -0.072329 |
| 17 | 6  | 0 | 3.796680  | -2.088167 | -0.012583 |
| 18 | 1  | 0 | 1.688408  | -2.540991 | 0.011095  |
| 19 | 6  | 0 | 4.770800  | -1.088404 | -0.026320 |
| 20 | 1  | 0 | 5.123643  | 1.039976  | -0.059307 |
| 21 | 1  | 0 | 4.090359  | -3.134359 | -0.012362 |
| 22 | 1  | 0 | 5.825020  | -1.349973 | -0.038243 |
| 23 | 8  | 0 | -0.185450 | -1.733657 | -1.327461 |
| 24 | 17 | 0 | -0.200212 | 3.669116  | -0.251133 |
| 25 | 7  | 0 | -1.530844 | 1.445214  | -0.807283 |
| 26 | 6  | 0 | -2.366154 | -1.536642 | 1.450602  |
| 27 | 1  | 0 | -2.951982 | -1.515065 | 2.377267  |
| 28 | 1  | 0 | -1.440230 | -2.074974 | 1.684199  |
| 29 | 6  | 0 | -3.693029 | -1.301586 | -0.698481 |
| 30 | 8  | 0 | -2.656284 | -0.531793 | -1.314217 |
| 31 | 1  | 0 | -4.442191 | -0.635374 | -0.242969 |
| 32 | 1  | 0 | -4.177369 | -1.827447 | -1.525183 |
| 33 | 6  | 0 | -3.130415 | -2.282362 | 0.325957  |
| 34 | 1  | 0 | -2.448806 | -2.955564 | -0.203030 |
| 35 | 1  | 0 | -3.943018 | -2.890684 | 0.739630  |

7b'

| Center<br>Number | Atomic<br>Number | Atomic<br>Type | Coordinates (Angstroms) |           |           |
|------------------|------------------|----------------|-------------------------|-----------|-----------|
|                  |                  |                | X                       | Y         | Z         |
| 1                | 6                | 0              | 0.158506                | 0.939821  | 0.741814  |
| 2                | 6                | 0              | -1.477141               | -0.596401 | -0.400766 |
| 3                | 6                | 0              | -0.001790               | -1.078536 | -0.547870 |
| 4                | 6                | 0              | -0.758196               | 1.549217  | -0.298720 |
| 5                | 1                | 0              | 0.886344                | 1.632577  | 1.155991  |
| 6                | 6                | 0              | -1.806981               | -0.576080 | 1.130691  |
| 7                | 1                | 0              | -1.668807               | -1.605556 | 1.478320  |
| 8                | 6                | 0              | -0.780305               | 0.350639  | 1.830744  |
| 9                | 1                | 0              | -1.278879               | 1.166289  | 2.365606  |
| 10               | 1                | 0              | -0.164570               | -0.194509 | 2.552428  |
| 11               | 7                | 0              | 0.848100                | -0.184842 | 0.083425  |
| 12               | 6                | 0              | 2.270788                | -0.286326 | 0.072309  |
| 13               | 6                | 0              | 3.054451                | 0.866236  | -0.075810 |
| 14               | 6                | 0              | 2.893977                | -1.533550 | 0.218458  |
| 15               | 6                | 0              | 4.445784                | 0.774456  | -0.053087 |
| 16               | 1                | 0              | 2.582771                | 1.831962  | -0.232599 |
| 17               | 6                | 0              | 4.285533                | -1.613772 | 0.223707  |
| 18               | 1                | 0              | 2.289902                | -2.426724 | 0.309428  |
| 19               | 6                | 0              | 5.068344                | -0.464875 | 0.096763  |
| 20               | 1                | 0              | 5.040760                | 1.676368  | -0.167759 |
| 21               | 1                | 0              | 4.758921                | -2.585411 | 0.335849  |
| 22               | 1                | 0              | 6.152234                | -0.535656 | 0.107851  |
| 23               | 8                | 0              | 0.327152                | -2.104065 | -1.108501 |
| 24               | 17               | 0              | -0.682653               | 3.283411  | -0.596013 |
| 25               | 7                | 0              | -1.583140               | 0.805739  | -0.896693 |
| 26               | 6                | 0              | -3.284492               | -0.169541 | 1.352270  |
| 27               | 1                | 0              | -3.358651               | 0.917530  | 1.463001  |
| 28               | 1                | 0              | -3.620563               | -0.603415 | 2.301828  |
| 29               | 6                | 0              | -3.554498               | -1.794316 | -0.567837 |
| 30               | 8                | 0              | -2.290395               | -1.440034 | -1.141892 |
| 31               | 1                | 0              | -4.171920               | -2.107198 | -1.414044 |
| 32               | 1                | 0              | -3.428135               | -2.665954 | 0.093239  |
| 33               | 6                | 0              | -4.189295               | -0.630422 | 0.185788  |

|    |   |   |           |           |           |
|----|---|---|-----------|-----------|-----------|
| 34 | 1 | 0 | -5.180419 | -0.924321 | 0.550422  |
| 35 | 1 | 0 | -4.330774 | 0.193234  | -0.522062 |

8

| Center Number | Atomic Number | Atomic Type | Coordinates (Angstroms) |           |           |
|---------------|---------------|-------------|-------------------------|-----------|-----------|
|               |               |             | X                       | Y         | Z         |
| 1             | 6             | 0           | -1.829020               | -1.197686 | -0.107386 |
| 2             | 6             | 0           | -0.458770               | -1.199296 | -0.143032 |
| 3             | 7             | 0           | 0.230834                | -0.023551 | -0.050650 |
| 4             | 6             | 0           | -0.445142               | 1.230134  | 0.055397  |
| 5             | 6             | 0           | -1.909957               | 1.069586  | 0.092950  |
| 6             | 7             | 0           | -2.551083               | -0.073138 | 0.015030  |
| 7             | 1             | 0           | 0.126744                | -2.102074 | -0.259327 |
| 8             | 8             | 0           | 0.147086                | 2.292508  | 0.111963  |
| 9             | 17            | 0           | -2.696077               | -2.712312 | -0.234415 |
| 10            | 6             | 0           | 1.673275                | -0.057379 | -0.015634 |
| 11            | 6             | 0           | 2.306496                | -0.931227 | 0.872201  |
| 12            | 6             | 0           | 2.417234                | 0.758333  | -0.872099 |
| 13            | 6             | 0           | 3.699195                | -1.003974 | 0.888245  |
| 14            | 1             | 0           | 1.716389                | -1.531890 | 1.558285  |
| 15            | 6             | 0           | 3.808209                | 0.679792  | -0.842392 |
| 16            | 1             | 0           | 1.915477                | 1.444224  | -1.542927 |
| 17            | 6             | 0           | 4.451435                | -0.199976 | 0.031258  |
| 18            | 1             | 0           | 4.191935                | -1.681193 | 1.579489  |
| 19            | 1             | 0           | 4.390378                | 1.310501  | -1.507570 |
| 20            | 1             | 0           | 5.536057                | -0.253162 | 0.048440  |
| 21            | 6             | 0           | -2.681089               | 2.274554  | 0.226949  |
| 22            | 7             | 0           | -3.309972               | 3.246072  | 0.334795  |

9

| Center Number | Atomic Number | Atomic Type | Coordinates (Angstroms) |           |           |
|---------------|---------------|-------------|-------------------------|-----------|-----------|
|               |               |             | X                       | Y         | Z         |
| 1             | 6             | 0           | -0.642688               | 0.488469  | 0.811503  |
| 2             | 6             | 0           | 0.736902                | -1.516551 | 0.311164  |
| 3             | 6             | 0           | -0.644056               | -1.527761 | -0.480883 |
| 4             | 6             | 0           | -0.276988               | -0.406292 | 1.995214  |
| 5             | 1             | 0           | -1.247514               | 1.358122  | 1.047747  |
| 6             | 6             | 0           | 1.425699                | -0.210565 | -0.133730 |
| 7             | 6             | 0           | 0.691991                | 0.867474  | 0.180026  |
| 8             | 7             | 0           | -1.355029               | -0.409619 | -0.128086 |
| 9             | 6             | 0           | -2.693610               | -0.144966 | -0.554126 |
| 10            | 6             | 0           | -3.624885               | 0.371244  | 0.354434  |
| 11            | 6             | 0           | -3.068851               | -0.396647 | -1.879124 |
| 12            | 6             | 0           | -4.923656               | 0.652310  | -0.068241 |
| 13            | 1             | 0           | -3.347475               | 0.537312  | 1.391275  |
| 14            | 6             | 0           | -4.375362               | -0.127066 | -2.283683 |
| 15            | 1             | 0           | -2.349212               | -0.807431 | -2.575975 |
| 16            | 6             | 0           | -5.304635               | 0.402781  | -1.386942 |
| 17            | 1             | 0           | -5.639349               | 1.055687  | 0.642393  |
| 18            | 1             | 0           | -4.662421               | -0.326017 | -3.312322 |
| 19            | 1             | 0           | -6.318586               | 0.616242  | -1.712460 |
| 20            | 8             | 0           | -0.963887               | -2.414627 | -1.239953 |
| 21            | 17            | 0           | -0.818910               | 0.003787  | 3.593470  |

|    |   |   |          |           |           |
|----|---|---|----------|-----------|-----------|
| 22 | 7 | 0 | 0.402231 | -1.448976 | 1.766631  |
| 23 | 6 | 0 | 1.510197 | -2.726387 | 0.028597  |
| 24 | 7 | 0 | 2.149120 | -3.664378 | -0.204062 |
| 25 | 6 | 0 | 1.004484 | 2.304636  | -0.003669 |
| 26 | 8 | 0 | 0.220940 | 3.191580  | 0.275016  |
| 27 | 8 | 0 | 2.237234 | 2.502437  | -0.494911 |
| 28 | 6 | 0 | 2.719424 | -0.267190 | -0.897120 |
| 29 | 8 | 0 | 2.793433 | -0.136560 | -2.095683 |
| 30 | 8 | 0 | 3.733260 | -0.548096 | -0.071273 |
| 31 | 6 | 0 | 2.600806 | 3.876382  | -0.731482 |
| 32 | 1 | 0 | 1.905127 | 4.335601  | -1.437647 |
| 33 | 1 | 0 | 2.588556 | 4.437839  | 0.205917  |
| 34 | 1 | 0 | 3.606510 | 3.839833  | -1.148711 |
| 35 | 6 | 0 | 5.011470 | -0.764564 | -0.707460 |
| 36 | 1 | 0 | 4.944405 | -1.608541 | -1.397483 |
| 37 | 1 | 0 | 5.319417 | 0.131518  | -1.251157 |
| 38 | 1 | 0 | 5.702452 | -0.983451 | 0.105607  |

10

| Center<br>Number | Atomic<br>Number | Atomic<br>Type | Coordinates (Angstroms) |           |           |
|------------------|------------------|----------------|-------------------------|-----------|-----------|
|                  |                  |                | X                       | Y         | Z         |
| 1                | 6                | 0              | -0.690464               | 0.963960  | -0.123131 |
| 2                | 6                | 0              | 0.474069                | -1.529895 | -0.023765 |
| 3                | 6                | 0              | -0.988433               | -1.457300 | 0.010712  |
| 4                | 1                | 0              | -1.171743               | 1.933351  | -0.175463 |
| 5                | 6                | 0              | 1.281073                | -0.412797 | -0.105335 |
| 6                | 6                | 0              | 0.683537                | 0.881960  | -0.146263 |
| 7                | 7                | 0              | -1.501924               | -0.115903 | -0.048129 |
| 8                | 6                | 0              | -2.931750               | 0.084180  | 0.028400  |
| 9                | 6                | 0              | -3.443325               | 0.939477  | 1.006155  |
| 10               | 6                | 0              | -3.778881               | -0.552463 | -0.881138 |
| 11               | 6                | 0              | -4.817261               | 1.175998  | 1.061811  |
| 12               | 1                | 0              | -2.774392               | 1.403984  | 1.724838  |
| 13               | 6                | 0              | -5.149975               | -0.313812 | -0.812138 |
| 14               | 1                | 0              | -3.369748               | -1.225972 | -1.624349 |
| 15               | 6                | 0              | -5.671494               | 0.550371  | 0.153784  |
| 16               | 1                | 0              | -5.215815               | 1.841888  | 1.821507  |
| 17               | 1                | 0              | -5.812282               | -0.805619 | -1.518411 |
| 18               | 1                | 0              | -6.741533               | 0.730763  | 0.200823  |
| 19               | 8                | 0              | -1.737925               | -2.413867 | 0.080487  |
| 20               | 6                | 0              | 1.034695                | -2.844587 | 0.019857  |
| 21               | 7                | 0              | 1.518058                | -3.901974 | 0.053281  |
| 22               | 6                | 0              | 1.402533                | 2.181343  | -0.191122 |
| 23               | 8                | 0              | 0.851567                | 3.253933  | -0.352422 |
| 24               | 8                | 0              | 2.727606                | 2.043487  | -0.003921 |
| 25               | 6                | 0              | 2.771424                | -0.620896 | -0.268297 |
| 26               | 8                | 0              | 3.323304                | -0.584875 | -1.342054 |
| 27               | 8                | 0              | 3.348083                | -0.910419 | 0.902834  |
| 28               | 6                | 0              | 3.493793                | 3.259886  | -0.064406 |
| 29               | 1                | 0              | 3.361196                | 3.743867  | -1.034801 |
| 30               | 1                | 0              | 3.180092                | 3.945491  | 0.726584  |
| 31               | 1                | 0              | 4.530741                | 2.955726  | 0.075879  |
| 32               | 6                | 0              | 4.752239                | -1.232874 | 0.834237  |
| 33               | 1                | 0              | 4.903043                | -2.115945 | 0.209189  |
| 34               | 1                | 0              | 5.313590                | -0.391880 | 0.420033  |
| 35               | 1                | 0              | 5.052147                | -1.431899 | 1.862542  |

11

| Center Number | Atomic Number | Atomic Type | Coordinates (Angstroms) |           |           |
|---------------|---------------|-------------|-------------------------|-----------|-----------|
|               |               |             | X                       | Y         | Z         |
| 1             | 6             | 0           | -1.608173               | -1.205283 | 0.021865  |
| 2             | 6             | 0           | -0.819117               | 1.405911  | 0.019861  |
| 3             | 6             | 0           | -2.498254               | -0.130530 | -0.065267 |
| 4             | 1             | 0           | -1.955474               | -2.231027 | 0.034624  |
| 5             | 6             | 0           | 0.179770                | 0.417713  | 0.096763  |
| 6             | 6             | 0           | -0.247980               | -0.922681 | 0.088919  |
| 7             | 17            | 0           | -4.212874               | -0.461341 | -0.181954 |
| 8             | 7             | 0           | -2.133574               | 1.135392  | -0.066265 |
| 9             | 6             | 0           | -0.495357               | 2.812603  | 0.074652  |
| 10            | 7             | 0           | -0.257948               | 3.947799  | 0.137615  |
| 11            | 6             | 0           | 0.684292                | -2.104929 | 0.138604  |
| 12            | 8             | 0           | 0.412877                | -3.133216 | 0.717221  |
| 13            | 8             | 0           | 1.792934                | -1.896783 | -0.584291 |
| 14            | 6             | 0           | 1.622970                | 0.775534  | 0.327300  |
| 15            | 8             | 0           | 2.281318                | 0.318796  | 1.235006  |
| 16            | 8             | 0           | 2.052720                | 1.674046  | -0.566261 |
| 17            | 6             | 0           | 2.764254                | -2.961931 | -0.550224 |
| 18            | 1             | 0           | 3.141570                | -3.088538 | 0.467203  |
| 19            | 1             | 0           | 2.313523                | -3.896287 | -0.892035 |
| 20            | 1             | 0           | 3.562022                | -2.646174 | -1.221612 |
| 21            | 6             | 0           | 3.391675                | 2.168979  | -0.360166 |
| 22            | 1             | 0           | 3.470098                | 2.644499  | 0.620069  |
| 23            | 1             | 0           | 4.109919                | 1.348329  | -0.425831 |
| 24            | 1             | 0           | 3.554583                | 2.894586  | -1.155904 |

12

| Center Number | Atomic Number | Atomic Type | Coordinates (Angstroms) |           |           |
|---------------|---------------|-------------|-------------------------|-----------|-----------|
|               |               |             | X                       | Y         | Z         |
| 1             | 6             | 0           | 3.869535                | -1.683271 | 0.187003  |
| 2             | 6             | 0           | 2.598139                | -1.461428 | 0.520481  |
| 3             | 6             | 0           | 1.811846                | -0.282110 | 0.120805  |
| 4             | 7             | 0           | 0.602577                | -0.161509 | 0.495898  |
| 5             | 6             | 0           | -0.204766               | 0.989303  | 0.120434  |
| 6             | 6             | 0           | -1.482711               | 0.493158  | -0.584809 |
| 7             | 6             | 0           | -2.413296               | -0.387763 | 0.264743  |
| 8             | 6             | 0           | -3.556980               | -0.938810 | -0.539465 |
| 9             | 6             | 0           | -4.844617               | -0.699504 | -0.310516 |
| 10            | 6             | 0           | 2.501125                | 0.711067  | -0.708567 |
| 11            | 7             | 0           | 3.067114                | 1.481958  | -1.360655 |
| 12            | 6             | 0           | -0.490521               | 1.806930  | 1.385619  |
| 13            | 1             | 0           | 4.384282                | -2.576984 | 0.518729  |
| 14            | 1             | 0           | 4.436119                | -0.987019 | -0.422851 |
| 15            | 1             | 0           | 2.040032                | -2.163390 | 1.131558  |
| 16            | 1             | 0           | 0.326353                | 1.638096  | -0.590344 |
| 17            | 1             | 0           | -2.033260               | 1.372535  | -0.937280 |
| 18            | 1             | 0           | -1.180464               | -0.059743 | -1.481765 |
| 19            | 1             | 0           | -1.824437               | -1.211937 | 0.684540  |
| 20            | 1             | 0           | -2.808611               | 0.183739  | 1.110789  |
| 21            | 1             | 0           | -3.281936               | -1.578154 | -1.378799 |
| 22            | 1             | 0           | -5.624753               | -1.126921 | -0.931645 |
| 23            | 1             | 0           | -5.169807               | -0.068284 | 0.512320  |

|    |   |   |           |          |          |
|----|---|---|-----------|----------|----------|
| 24 | 1 | 0 | -1.169985 | 2.632311 | 1.154544 |
| 25 | 1 | 0 | 0.434654  | 2.229207 | 1.785768 |
| 26 | 1 | 0 | -0.942549 | 1.187967 | 2.163366 |

**TS7a**

| Center<br>Number | Atomic<br>Number | Atomic<br>Type | Coordinates (Angstroms) |           |           |
|------------------|------------------|----------------|-------------------------|-----------|-----------|
|                  |                  |                | X                       | Y         | Z         |
| 1                | 6                | 0              | -0.124854               | 1.241716  | 0.363265  |
| 2                | 6                | 0              | -1.710366               | -0.492225 | -0.722472 |
| 3                | 6                | 0              | -0.253480               | -0.837786 | -0.804241 |
| 4                | 6                | 0              | -1.320703               | 1.646691  | -0.258812 |
| 5                | 1                | 0              | 0.510701                | 1.945260  | 0.882640  |
| 6                | 6                | 0              | -1.989042               | -0.778843 | 1.365234  |
| 7                | 1                | 0              | -3.006643               | -0.394519 | 1.311214  |
| 8                | 6                | 0              | -1.067271               | 0.041838  | 2.015388  |
| 9                | 1                | 0              | -1.418129               | 0.908382  | 2.566363  |
| 10               | 1                | 0              | -0.108475               | -0.358010 | 2.337608  |
| 11               | 7                | 0              | 0.538146                | 0.154145  | -0.240790 |
| 12               | 6                | 0              | 1.961581                | 0.038282  | -0.124200 |
| 13               | 6                | 0              | 2.752315                | 1.175300  | -0.333091 |
| 14               | 6                | 0              | 2.564134                | -1.181246 | 0.208776  |
| 15               | 6                | 0              | 4.136487                | 1.098475  | -0.185808 |
| 16               | 1                | 0              | 2.287368                | 2.110400  | -0.630396 |
| 17               | 6                | 0              | 3.950058                | -1.247495 | 0.343628  |
| 18               | 1                | 0              | 1.956075                | -2.066896 | 0.336214  |
| 19               | 6                | 0              | 4.740616                | -0.112509 | 0.153994  |
| 20               | 1                | 0              | 4.741284                | 1.985610  | -0.351088 |
| 21               | 1                | 0              | 4.412630                | -2.196307 | 0.600686  |
| 22               | 1                | 0              | 5.819791                | -0.173659 | 0.261419  |
| 23               | 8                | 0              | 0.168238                | -1.887828 | -1.278500 |
| 24               | 17               | 0              | -1.873126               | 3.302211  | -0.029841 |
| 25               | 7                | 0              | -2.124840               | 0.787263  | -0.825584 |
| 26               | 6                | 0              | -1.891581               | -2.270868 | 1.141004  |
| 27               | 1                | 0              | -2.462865               | -2.805517 | 1.910726  |
| 28               | 1                | 0              | -0.851796               | -2.603168 | 1.225235  |
| 29               | 6                | 0              | -2.469808               | -2.638101 | -0.259138 |
| 30               | 8                | 0              | -2.576905               | -1.459943 | -1.090413 |
| 31               | 1                | 0              | -3.491772               | -3.020146 | -0.191701 |
| 32               | 1                | 0              | -1.837354               | -3.376080 | -0.756856 |

**TS7a'**

| Center<br>Number | Atomic<br>Number | Atomic<br>Type | Coordinates (Angstroms) |           |           |
|------------------|------------------|----------------|-------------------------|-----------|-----------|
|                  |                  |                | X                       | Y         | Z         |
| 1                | 6                | 0              | -0.050007               | 1.191864  | 0.027266  |
| 2                | 6                | 0              | -1.475264               | -0.886381 | -0.597627 |
| 3                | 6                | 0              | -0.008970               | -1.122541 | -0.666305 |
| 4                | 6                | 0              | -1.292381               | 1.341083  | -0.614394 |
| 5                | 1                | 0              | 0.533209                | 2.057282  | 0.309904  |
| 6                | 6                | 0              | -1.575698               | -0.763267 | 1.536398  |
| 7                | 1                | 0              | -0.961434               | -1.646738 | 1.703892  |
| 8                | 6                | 0              | -1.022031               | 0.467213  | 1.901989  |
| 9                | 1                | 0              | -1.664512               | 1.323351  | 2.090750  |
| 10               | 1                | 0              | -0.070429               | 0.481942  | 2.424281  |

|    |    |   |           |           |           |
|----|----|---|-----------|-----------|-----------|
| 11 | 7  | 0 | 0.691105  | 0.053495  | -0.330847 |
| 12 | 6  | 0 | 2.107037  | 0.019781  | -0.099901 |
| 13 | 6  | 0 | 2.942563  | -0.656519 | -0.997897 |
| 14 | 6  | 0 | 2.660886  | 0.678016  | 1.005043  |
| 15 | 6  | 0 | 4.319243  | -0.667968 | -0.782247 |
| 16 | 1  | 0 | 2.514100  | -1.171376 | -1.846995 |
| 17 | 6  | 0 | 4.041608  | 0.667189  | 1.204340  |
| 18 | 1  | 0 | 2.023719  | 1.190344  | 1.718536  |
| 19 | 6  | 0 | 4.876427  | -0.006756 | 0.313855  |
| 20 | 1  | 0 | 4.959594  | -1.194773 | -1.484115 |
| 21 | 1  | 0 | 4.459108  | 1.181951  | 2.065176  |
| 22 | 1  | 0 | 5.950915  | -0.017762 | 0.472495  |
| 23 | 8  | 0 | 0.517570  | -2.192966 | -0.920701 |
| 24 | 17 | 0 | -1.992568 | 2.951863  | -0.737766 |
| 25 | 7  | 0 | -2.016301 | 0.308306  | -0.937878 |
| 26 | 6  | 0 | -3.064382 | -1.033062 | 1.444321  |
| 27 | 1  | 0 | -3.610768 | -0.085293 | 1.462242  |
| 28 | 1  | 0 | -3.387294 | -1.608780 | 2.320822  |
| 29 | 6  | 0 | -3.423697 | -1.832404 | 0.149118  |
| 30 | 8  | 0 | -2.248762 | -1.986836 | -0.666582 |
| 31 | 1  | 0 | -4.202100 | -1.312114 | -0.417289 |
| 32 | 1  | 0 | -3.756545 | -2.851385 | 0.357887  |

**TS7b**

| Center Number | Atomic Number | Atomic Type | Coordinates (Angstroms) |           |           |
|---------------|---------------|-------------|-------------------------|-----------|-----------|
|               |               |             | X                       | Y         | Z         |
| 1             | 6             | 0           | 0.191460                | 1.375256  | 0.345153  |
| 2             | 6             | 0           | -1.619373               | -0.128548 | -0.800237 |
| 3             | 6             | 0           | -0.219682               | -0.659032 | -0.860675 |
| 4             | 6             | 0           | -0.958483               | 1.938619  | -0.236037 |
| 5             | 1             | 0           | 0.923114                | 1.985566  | 0.857038  |
| 6             | 6             | 0           | -1.813246               | -0.425479 | 1.443640  |
| 7             | 1             | 0           | -2.820314               | -0.024692 | 1.355129  |
| 8             | 6             | 0           | -0.866680               | 0.428658  | 2.008869  |
| 9             | 1             | 0           | -1.181998               | 1.371651  | 2.444640  |
| 10            | 1             | 0           | 0.044268                | 0.007221  | 2.430261  |
| 11            | 7             | 0           | 0.694090                | 0.222825  | -0.277419 |
| 12            | 6             | 0           | 2.089636                | -0.084646 | -0.163303 |
| 13            | 6             | 0           | 3.025574                | 0.929616  | -0.400062 |
| 14            | 6             | 0           | 2.522908                | -1.366279 | 0.197342  |
| 15            | 6             | 0           | 4.387491                | 0.670500  | -0.251641 |
| 16            | 1             | 0           | 2.688873                | 1.911468  | -0.719403 |
| 17            | 6             | 0           | 3.887559                | -1.616277 | 0.332864  |
| 18            | 1             | 0           | 1.800554                | -2.157797 | 0.346889  |
| 19            | 6             | 0           | 4.823319                | -0.602835 | 0.116297  |
| 20            | 1             | 0           | 5.106089                | 1.463506  | -0.438358 |
| 21            | 1             | 0           | 4.219068                | -2.612522 | 0.611994  |
| 22            | 1             | 0           | 5.884729                | -0.806904 | 0.224576  |
| 23            | 8             | 0           | 0.093724                | -1.737965 | -1.347820 |
| 24            | 17            | 0           | -1.310631               | 3.636234  | 0.070896  |
| 25            | 7             | 0           | -1.865447               | 1.197042  | -0.809284 |
| 26            | 6             | 0           | -1.733701               | -1.938397 | 1.524373  |
| 27            | 1             | 0           | -2.263047               | -2.229940 | 2.443674  |
| 28            | 1             | 0           | -0.691379               | -2.244407 | 1.673874  |
| 29            | 6             | 0           | -3.249251               | -1.897846 | -0.586706 |
| 30            | 8             | 0           | -2.563444               | -0.912033 | -1.381469 |
| 31            | 1             | 0           | -4.046163               | -1.398357 | -0.017065 |



|    |   |   |           |           |           |
|----|---|---|-----------|-----------|-----------|
| 32 | 1 | 0 | -3.725419 | -2.545424 | -1.326601 |
| 33 | 6 | 0 | -2.339400 | -2.719873 | 0.322064  |
| 34 | 1 | 0 | -1.541197 | -3.129536 | -0.300659 |
| 35 | 1 | 0 | -2.927973 | -3.565509 | 0.698380  |

### TS7b'

| Center<br>Number | Atomic<br>Number | Atomic<br>Type | Coordinates (Angstroms) |           |           |
|------------------|------------------|----------------|-------------------------|-----------|-----------|
|                  |                  |                | X                       | Y         | Z         |
| 1                | 6                | 0              | 0.243919                | 1.167666  | 0.282421  |
| 2                | 6                | 0              | -1.332762               | -0.620477 | -0.764061 |
| 3                | 6                | 0              | 0.115321                | -0.979934 | -0.812670 |
| 4                | 6                | 0              | -0.952211               | 1.551234  | -0.345809 |
| 5                | 1                | 0              | 0.891769                | 1.894973  | 0.752340  |
| 6                | 6                | 0              | -1.379071               | -0.913095 | 1.429345  |
| 7                | 1                | 0              | -0.797887               | -1.828084 | 1.341449  |
| 8                | 6                | 0              | -0.706286               | 0.194453  | 1.958833  |
| 9                | 1                | 0              | -1.275206               | 1.016235  | 2.389788  |
| 10               | 1                | 0              | 0.283654                | 0.058641  | 2.385711  |
| 11               | 7                | 0              | 0.898807                | 0.053150  | -0.284028 |
| 12               | 6                | 0              | 2.315924                | -0.082045 | -0.118856 |
| 13               | 6                | 0              | 3.137274                | 1.018132  | -0.394878 |
| 14               | 6                | 0              | 2.882076                | -1.282434 | 0.327911  |
| 15               | 6                | 0              | 4.515068                | 0.926311  | -0.201946 |
| 16               | 1                | 0              | 2.699803                | 1.935305  | -0.778124 |
| 17               | 6                | 0              | 4.262188                | -1.365841 | 0.506526  |
| 18               | 1                | 0              | 2.250754                | -2.142321 | 0.509854  |
| 19               | 6                | 0              | 5.082613                | -0.265661 | 0.249824  |
| 20               | 1                | 0              | 5.143819                | 1.785196  | -0.419290 |
| 21               | 1                | 0              | 4.696464                | -2.300009 | 0.851625  |
| 22               | 1                | 0              | 6.156933                | -0.339667 | 0.392615  |
| 23               | 8                | 0              | 0.553962                | -2.039554 | -1.231702 |
| 24               | 17               | 0              | -1.526659               | 3.205637  | -0.160138 |
| 25               | 7                | 0              | -1.740446               | 0.664572  | -0.886623 |
| 26               | 6                | 0              | -2.884039               | -1.159172 | 1.604191  |
| 27               | 1                | 0              | -3.219412               | -0.650873 | 2.516737  |
| 28               | 1                | 0              | -3.015405               | -2.232556 | 1.789670  |
| 29               | 6                | 0              | -3.557566               | -1.399596 | -0.885523 |
| 30               | 8                | 0              | -2.151791               | -1.608099 | -1.158356 |
| 31               | 1                | 0              | -3.994600               | -0.814508 | -1.702339 |
| 32               | 1                | 0              | -3.971117               | -2.411357 | -0.920196 |
| 33               | 6                | 0              | -3.835241               | -0.733625 | 0.466893  |
| 34               | 1                | 0              | -4.860275               | -0.997809 | 0.757241  |
| 35               | 1                | 0              | -3.805233               | 0.352682  | 0.357069  |

### TS9

| Center<br>Number | Atomic<br>Number | Atomic<br>Type | Coordinates (Angstroms) |           |           |
|------------------|------------------|----------------|-------------------------|-----------|-----------|
|                  |                  |                | X                       | Y         | Z         |
| 1                | 6                | 0              | -0.761698               | 0.583972  | 1.143128  |
| 2                | 6                | 0              | 1.190923                | -1.129029 | 1.437531  |
| 3                | 6                | 0              | -0.064668               | -1.697259 | 0.874388  |
| 4                | 6                | 0              | 0.236510                | 0.771194  | 2.140909  |
| 5                | 1                | 0              | -1.549422               | 1.315247  | 1.005414  |
| 6                | 6                | 0              | 1.278387                | 0.256246  | -0.660795 |

|    |    |   |           |           |           |
|----|----|---|-----------|-----------|-----------|
| 7  | 6  | 0 | 0.427214  | 1.140083  | -0.400317 |
| 8  | 7  | 0 | -1.087022 | -0.732697 | 0.828524  |
| 9  | 6  | 0 | -2.300795 | -0.995620 | 0.099597  |
| 10 | 6  | 0 | -3.522536 | -0.663511 | 0.689203  |
| 11 | 6  | 0 | -2.247181 | -1.544638 | -1.185371 |
| 12 | 6  | 0 | -4.706182 | -0.871599 | -0.018769 |
| 13 | 1  | 0 | -3.544070 | -0.259618 | 1.697405  |
| 14 | 6  | 0 | -3.437873 | -1.755942 | -1.878300 |
| 15 | 1  | 0 | -1.291598 | -1.799109 | -1.630210 |
| 16 | 6  | 0 | -4.665169 | -1.420086 | -1.301213 |
| 17 | 1  | 0 | -5.657306 | -0.613913 | 0.437831  |
| 18 | 1  | 0 | -3.403621 | -2.182115 | -2.876690 |
| 19 | 1  | 0 | -5.587609 | -1.588954 | -1.849499 |
| 20 | 8  | 0 | -0.191220 | -2.849477 | 0.504416  |
| 21 | 17 | 0 | 0.257708  | 2.252024  | 3.056373  |
| 22 | 7  | 0 | 1.228693  | -0.068283 | 2.266428  |
| 23 | 6  | 0 | 2.341388  | -1.988261 | 1.413747  |
| 24 | 7  | 0 | 3.285637  | -2.663729 | 1.355715  |
| 25 | 6  | 0 | -0.095926 | 2.444028  | -0.861624 |
| 26 | 8  | 0 | -1.086303 | 2.995768  | -0.426279 |
| 27 | 8  | 0 | 0.681653  | 2.936763  | -1.837824 |
| 28 | 6  | 0 | 2.131134  | -0.617667 | -1.448298 |
| 29 | 8  | 0 | 1.673904  | -1.417039 | -2.241598 |
| 30 | 8  | 0 | 3.425873  | -0.437965 | -1.166477 |
| 31 | 6  | 0 | 0.262501  | 4.209563  | -2.371488 |
| 32 | 1  | 0 | -0.734411 | 4.127420  | -2.811323 |
| 33 | 1  | 0 | 0.248821  | 4.965560  | -1.582716 |
| 34 | 1  | 0 | 1.002318  | 4.456312  | -3.132350 |
| 35 | 6  | 0 | 4.336785  | -1.331698 | -1.845112 |
| 36 | 1  | 0 | 4.132508  | -2.362396 | -1.549297 |
| 37 | 1  | 0 | 4.235086  | -1.226085 | -2.927604 |
| 38 | 1  | 0 | 5.328971  | -1.026864 | -1.515188 |

## TS10

| Center<br>Number | Atomic<br>Number | Atomic<br>Type | Coordinates (Angstroms) |           |           |
|------------------|------------------|----------------|-------------------------|-----------|-----------|
|                  |                  |                | X                       | Y         | Z         |
| 1                | 6                | 0              | 0.603585                | -0.723234 | -0.090911 |
| 2                | 6                | 0              | -0.579018               | 1.590525  | 0.222302  |
| 3                | 6                | 0              | 0.880847                | 1.656902  | -0.087192 |
| 4                | 6                | 0              | 0.298249                | -0.599194 | 1.791189  |
| 5                | 1                | 0              | 1.094472                | -1.677317 | -0.246093 |
| 6                | 6                | 0              | -1.387710               | 0.575164  | -0.346391 |
| 7                | 6                | 0              | -0.766575               | -0.648631 | -0.519686 |
| 8                | 7                | 0              | 1.426529                | 0.389626  | -0.330094 |
| 9                | 6                | 0              | 2.848589                | 0.228489  | -0.480784 |
| 10               | 6                | 0              | 3.540685                | -0.729904 | 0.265611  |
| 11               | 6                | 0              | 3.528619                | 1.027486  | -1.406538 |
| 12               | 6                | 0              | 4.912333                | -0.897696 | 0.072569  |
| 13               | 1                | 0              | 3.025879                | -1.335441 | 1.004007  |
| 14               | 6                | 0              | 4.900364                | 0.857518  | -1.581670 |
| 15               | 1                | 0              | 2.988889                | 1.773695  | -1.975524 |
| 16               | 6                | 0              | 5.596632                | -0.105326 | -0.848476 |
| 17               | 1                | 0              | 5.443611                | -1.644340 | 0.655650  |
| 18               | 1                | 0              | 5.424098                | 1.480492  | -2.300919 |
| 19               | 1                | 0              | 6.665466                | -0.234281 | -0.991954 |
| 20               | 8                | 0              | 1.509066                | 2.697227  | -0.122352 |
| 21               | 17               | 0              | 0.701701                | -2.093554 | 2.555677  |

|    |   |   |           |           |           |
|----|---|---|-----------|-----------|-----------|
| 22 | 7 | 0 | -0.092125 | 0.468906  | 2.201958  |
| 23 | 6 | 0 | -1.168384 | 2.810416  | 0.677102  |
| 24 | 7 | 0 | -1.681918 | 3.784578  | 1.048966  |
| 25 | 6 | 0 | -1.421071 | -1.942000 | -0.855402 |
| 26 | 8 | 0 | -0.837235 | -3.008412 | -0.828805 |
| 27 | 8 | 0 | -2.710567 | -1.792971 | -1.192484 |
| 28 | 6 | 0 | -2.849779 | 0.854540  | -0.609213 |
| 29 | 8 | 0 | -3.275216 | 1.189234  | -1.688470 |
| 30 | 8 | 0 | -3.561471 | 0.745980  | 0.518176  |
| 31 | 6 | 0 | -3.403071 | -3.000028 | -1.565362 |
| 32 | 1 | 0 | -2.896156 | -3.482498 | -2.404164 |
| 33 | 1 | 0 | -3.440201 | -3.690361 | -0.719173 |
| 34 | 1 | 0 | -4.404552 | -2.680053 | -1.850671 |
| 35 | 6 | 0 | -4.954750 | 1.105178  | 0.407327  |
| 36 | 1 | 0 | -5.049393 | 2.143053  | 0.080303  |
| 37 | 1 | 0 | -5.457795 | 0.449548  | -0.307563 |
| 38 | 1 | 0 | -5.364504 | 0.976442  | 1.408417  |

## TS11

| Center<br>Number | Atomic<br>Number | Atomic<br>Type | Coordinates (Angstroms) |           |           |
|------------------|------------------|----------------|-------------------------|-----------|-----------|
|                  |                  |                | X                       | Y         | Z         |
| 1                | 6                | 0              | -0.593017               | -0.202048 | 1.076055  |
| 2                | 6                | 0              | 1.240799                | -1.628688 | -0.097385 |
| 3                | 6                | 0              | -0.656508               | -1.013371 | -1.407066 |
| 4                | 6                | 0              | -0.331396               | -1.577953 | 1.517937  |
| 5                | 1                | 0              | -1.352262               | 0.370850  | 1.597282  |
| 6                | 6                | 0              | 1.550929                | -0.234145 | 0.064586  |
| 7                | 6                | 0              | 0.655852                | 0.501502  | 0.812123  |
| 8                | 7                | 0              | -1.322235               | -0.458274 | -0.478067 |
| 9                | 6                | 0              | -2.618970               | 0.122978  | -0.710543 |
| 10               | 6                | 0              | -3.678325               | -0.219906 | 0.133117  |
| 11               | 6                | 0              | -2.795697               | 1.023117  | -1.763653 |
| 12               | 6                | 0              | -4.930137               | 0.355118  | -0.083744 |
| 13               | 1                | 0              | -3.525682               | -0.932831 | 0.937560  |
| 14               | 6                | 0              | -4.056552               | 1.580665  | -1.975093 |
| 15               | 1                | 0              | -1.957991               | 1.284688  | -2.402837 |
| 16               | 6                | 0              | -5.122868               | 1.252213  | -1.136375 |
| 17               | 1                | 0              | -5.757102               | 0.092736  | 0.569515  |
| 18               | 1                | 0              | -4.199086               | 2.280239  | -2.793412 |
| 19               | 1                | 0              | -6.100953               | 1.694085  | -1.301794 |
| 20               | 8                | 0              | -0.473979               | -1.412458 | -2.500156 |
| 21               | 17               | 0              | -1.286232               | -2.261557 | 2.813502  |
| 22               | 7                | 0              | 0.505028                | -2.302151 | 0.872417  |
| 23               | 6                | 0              | 2.017033                | -2.448879 | -0.978952 |
| 24               | 7                | 0              | 2.619393                | -3.086086 | -1.743197 |
| 25               | 6                | 0              | 0.734365                | 1.926742  | 1.179847  |
| 26               | 8                | 0              | -0.212686               | 2.567678  | 1.600301  |
| 27               | 8                | 0              | 1.974352                | 2.431513  | 1.025840  |
| 28               | 6                | 0              | 2.710225                | 0.358214  | -0.696089 |
| 29               | 8                | 0              | 2.572823                | 1.081534  | -1.655968 |
| 30               | 8                | 0              | 3.878922                | -0.072675 | -0.206847 |
| 31               | 6                | 0              | 2.113874                | 3.830549  | 1.326214  |
| 32               | 1                | 0              | 1.471453                | 4.427111  | 0.673655  |
| 33               | 1                | 0              | 1.847036                | 4.024499  | 2.368070  |
| 34               | 1                | 0              | 3.163729                | 4.062059  | 1.147063  |
| 35               | 6                | 0              | 5.049012                | 0.361770  | -0.928485 |
| 36               | 1                | 0              | 5.012774                | -0.005474 | -1.956760 |

|    |   |   |          |           |           |
|----|---|---|----------|-----------|-----------|
| 37 | 1 | 0 | 5.107736 | 1.452869  | -0.932708 |
| 38 | 1 | 0 | 5.893831 | -0.070786 | -0.393569 |

## TS12

| Center<br>Number | Atomic<br>Number | Atomic<br>Type | Coordinates (Angstroms) |           |           |
|------------------|------------------|----------------|-------------------------|-----------|-----------|
|                  |                  |                | X                       | Y         | Z         |
| 1                | 6                | 0              | -0.309634               | 1.092494  | 0.237186  |
| 2                | 6                | 0              | -1.785039               | -0.962012 | -0.373360 |
| 3                | 6                | 0              | -0.319780               | -1.189374 | -0.499815 |
| 4                | 6                | 0              | -1.616482               | 1.268211  | -0.278103 |
| 5                | 1                | 0              | 0.291365                | 1.943832  | 0.528815  |
| 6                | 6                | 0              | -1.610558               | -0.841516 | 1.910885  |
| 7                | 6                | 0              | -0.947525               | 0.357297  | 2.163919  |
| 8                | 7                | 0              | 0.402105                | -0.015000 | -0.227231 |
| 9                | 6                | 0              | 1.837190                | -0.001939 | -0.165017 |
| 10               | 6                | 0              | 2.519783                | 1.101323  | -0.690833 |
| 11               | 6                | 0              | 2.546014                | -1.054456 | 0.425487  |
| 12               | 6                | 0              | 3.909746                | 1.163752  | -0.603681 |
| 13               | 1                | 0              | 1.966790                | 1.895265  | -1.184510 |
| 14               | 6                | 0              | 3.936580                | -0.984634 | 0.497405  |
| 15               | 1                | 0              | 2.018433                | -1.921747 | 0.800430  |
| 16               | 6                | 0              | 4.621872                | 0.121530  | -0.008737 |
| 17               | 1                | 0              | 4.433679                | 2.021844  | -1.014583 |
| 18               | 1                | 0              | 4.485440                | -1.803068 | 0.954221  |
| 19               | 1                | 0              | 5.705399                | 0.166313  | 0.051594  |
| 20               | 8                | 0              | 0.193923                | -2.260218 | -0.779275 |
| 21               | 17               | 0              | -2.314577               | 2.876324  | -0.268034 |
| 22               | 7                | 0              | -2.365813               | 0.249567  | -0.577533 |
| 23               | 6                | 0              | -2.616880               | -2.119604 | -0.580318 |
| 24               | 7                | 0              | -3.304758               | -3.048703 | -0.697071 |
| 25               | 1                | 0              | -2.692027               | -0.891299 | 1.974958  |
| 26               | 1                | 0              | -1.516005               | 1.228773  | 2.475772  |
| 27               | 1                | 0              | 0.082997                | 0.328284  | 2.509063  |
| 28               | 1                | 0              | -1.092109               | -1.791450 | 1.997745  |

## bmimPF<sub>6</sub> (A)

| Center<br>Number | Atomic<br>Number | Atomic<br>Type | Coordinates (Angstroms) |           |           |
|------------------|------------------|----------------|-------------------------|-----------|-----------|
|                  |                  |                | X                       | Y         | Z         |
| 1                | 6                | 0              | 0.960008                | 1.366933  | 0.304158  |
| 2                | 6                | 0              | 2.695689                | 2.129014  | -0.830261 |
| 3                | 6                | 0              | 2.050912                | 3.199925  | -0.282948 |
| 4                | 7                | 0              | 0.967173                | 2.700242  | 0.418784  |
| 5                | 1                | 0              | 0.216320                | 0.699234  | 0.720998  |
| 6                | 1                | 0              | 3.572079                | 2.077719  | -1.457627 |
| 7                | 1                | 0              | 2.261137                | 4.256920  | -0.336547 |
| 8                | 7                | 0              | 1.999812                | 0.994821  | -0.451186 |
| 9                | 6                | 0              | -0.038173               | 3.479171  | 1.152448  |
| 10               | 1                | 0              | -0.318470               | 4.347321  | 0.552470  |
| 11               | 1                | 0              | -0.916387               | 2.849776  | 1.301046  |
| 12               | 1                | 0              | 0.370258                | 3.804674  | 2.112885  |
| 13               | 6                | 0              | 2.269199                | -0.397210 | -0.883349 |
| 14               | 6                | 0              | 2.501234                | -1.349641 | 0.292466  |
| 15               | 1                | 0              | 3.148461                | -0.347228 | -1.532145 |

|    |    |   |           |           |           |
|----|----|---|-----------|-----------|-----------|
| 16 | 1  | 0 | 1.409582  | -0.716726 | -1.478407 |
| 17 | 6  | 0 | 2.789130  | -2.777351 | -0.195071 |
| 18 | 1  | 0 | 3.339006  | -0.983554 | 0.902898  |
| 19 | 1  | 0 | 1.607986  | -1.361330 | 0.928386  |
| 20 | 6  | 0 | 2.998754  | -3.760414 | 0.962301  |
| 21 | 1  | 0 | 1.950943  | -3.119577 | -0.816475 |
| 22 | 1  | 0 | 3.679241  | -2.773734 | -0.841373 |
| 23 | 1  | 0 | 3.202331  | -4.769685 | 0.587274  |
| 24 | 1  | 0 | 3.845750  | -3.460873 | 1.592935  |
| 25 | 1  | 0 | 2.107445  | -3.814196 | 1.598543  |
| 26 | 15 | 0 | -2.174252 | -0.508646 | -0.106790 |
| 27 | 9  | 0 | -2.064867 | 1.130241  | 0.194979  |
| 28 | 9  | 0 | -0.934649 | -0.330553 | -1.209959 |
| 29 | 9  | 0 | -0.996469 | -0.732360 | 1.074895  |
| 30 | 9  | 0 | -3.327449 | -0.642516 | 1.026641  |
| 31 | 9  | 0 | -2.187697 | -2.109460 | -0.383530 |
| 32 | 9  | 0 | -3.265681 | -0.233915 | -1.272432 |

**bmimPF<sub>6</sub> (B)**

| Center<br>Number | Atomic<br>Number | Atomic<br>Type | Coordinates (Angstroms) |           |           |
|------------------|------------------|----------------|-------------------------|-----------|-----------|
|                  |                  |                | X                       | Y         | Z         |
| 1                | 6                | 0              | 0.648453                | 1.686732  | 0.613100  |
| 2                | 6                | 0              | 2.606593                | 2.101699  | -0.319734 |
| 3                | 6                | 0              | 1.759104                | 3.117163  | -0.652843 |
| 4                | 7                | 0              | 0.538873                | 2.836791  | -0.060965 |
| 5                | 1                | 0              | -0.152310               | 1.186417  | 1.136707  |
| 6                | 1                | 0              | 3.639441                | 1.930715  | -0.580478 |
| 7                | 1                | 0              | 1.913251                | 3.999552  | -1.254546 |
| 8                | 7                | 0              | 1.893621                | 1.219739  | 0.475076  |
| 9                | 6                | 0              | -0.697938               | 3.618295  | -0.188438 |
| 10               | 1                | 0              | -0.798000               | 3.948523  | -1.224219 |
| 11               | 1                | 0              | -1.539066               | 2.970228  | 0.062532  |
| 12               | 1                | 0              | -0.664231               | 4.484340  | 0.478066  |
| 13               | 6                | 0              | 2.359253                | -0.097359 | 0.963363  |
| 14               | 6                | 0              | 2.474288                | -1.124195 | -0.168172 |
| 15               | 1                | 0              | 1.627324                | -0.429135 | 1.701986  |
| 16               | 1                | 0              | 3.318039                | 0.063227  | 1.468085  |
| 17               | 6                | 0              | 2.877911                | -2.505275 | 0.368005  |
| 18               | 1                | 0              | 1.507310                | -1.190642 | -0.678788 |
| 19               | 1                | 0              | 3.214372                | -0.781909 | -0.906096 |
| 20               | 6                | 0              | 3.000742                | -3.549779 | -0.747625 |
| 21               | 1                | 0              | 3.832650                | -2.430155 | 0.910083  |
| 22               | 1                | 0              | 2.126621                | -2.838126 | 1.096310  |
| 23               | 1                | 0              | 3.275644                | -4.529078 | -0.339625 |
| 24               | 1                | 0              | 2.050889                | -3.664205 | -1.282548 |
| 25               | 1                | 0              | 3.768196                | -3.264492 | -1.478694 |
| 26               | 15               | 0              | -1.973999               | -0.711188 | -0.028815 |
| 27               | 9                | 0              | -1.599232               | -2.193935 | -0.581177 |
| 28               | 9                | 0              | -0.824895               | -0.047945 | -1.039240 |
| 29               | 9                | 0              | -3.105848               | -0.502715 | -1.172540 |
| 30               | 9                | 0              | -3.059958               | -1.312963 | 1.013730  |
| 31               | 9                | 0              | -2.264818               | 0.832424  | 0.552845  |
| 32               | 9                | 0              | -0.779475               | -0.848959 | 1.139575  |

**bmimPF<sub>6</sub> (C)**

| Center<br>Number | Atomic<br>Number | Atomic<br>Type | Coordinates (Angstroms) |           |           |
|------------------|------------------|----------------|-------------------------|-----------|-----------|
|                  |                  |                | X                       | Y         | Z         |
| 1                | 6                | 0              | -0.610725               | 1.250745  | 0.319383  |
| 2                | 6                | 0              | -2.060447               | 2.382073  | -0.904977 |
| 3                | 6                | 0              | -1.175667               | 3.272572  | -0.371289 |
| 4                | 7                | 0              | -0.279016               | 2.543664  | 0.391327  |
| 5                | 1                | 0              | -0.059466               | 0.442872  | 0.778868  |
| 6                | 1                | 0              | -2.904373               | 2.530766  | -1.560788 |
| 7                | 1                | 0              | -1.099015               | 4.343794  | -0.476415 |
| 8                | 7                | 0              | -1.687423               | 1.123509  | -0.463762 |
| 9                | 6                | 0              | 0.909033                | 3.063231  | 1.081139  |
| 10               | 1                | 0              | 0.601388                | 3.754907  | 1.869376  |
| 11               | 1                | 0              | 1.457313                | 2.219845  | 1.501002  |
| 12               | 1                | 0              | 1.547465                | 3.572116  | 0.355816  |
| 13               | 6                | 0              | -2.327285               | -0.163686 | -0.807296 |
| 14               | 6                | 0              | -3.393555               | -0.583864 | 0.209310  |
| 15               | 1                | 0              | -1.523735               | -0.901420 | -0.874175 |
| 16               | 1                | 0              | -2.757511               | -0.040528 | -1.805808 |
| 17               | 6                | 0              | -4.048911               | -1.917665 | -0.177401 |
| 18               | 1                | 0              | -2.927456               | -0.675786 | 1.199548  |
| 19               | 1                | 0              | -4.159997               | 0.200358  | 0.288181  |
| 20               | 6                | 0              | -5.105671               | -2.371982 | 0.835928  |
| 21               | 1                | 0              | -4.509960               | -1.823068 | -1.171087 |
| 22               | 1                | 0              | -3.272002               | -2.688714 | -0.268447 |
| 23               | 1                | 0              | -5.556287               | -3.323462 | 0.532529  |
| 24               | 1                | 0              | -4.665614               | -2.514385 | 1.830546  |
| 25               | 1                | 0              | -5.913048               | -1.634524 | 0.929131  |
| 26               | 15               | 0              | 2.298883                | -0.872222 | -0.064769 |
| 27               | 9                | 0              | 0.713673                | -1.355232 | -0.304416 |
| 28               | 9                | 0              | 1.919915                | 0.558407  | -0.829186 |
| 29               | 9                | 0              | 2.722554                | -1.531315 | -1.484528 |
| 30               | 9                | 0              | 3.805220                | -0.329538 | 0.207837  |
| 31               | 9                | 0              | 2.595894                | -2.253396 | 0.732340  |
| 32               | 9                | 0              | 1.787576                | -0.159837 | 1.371455  |
